# Supplementary material for: Quantitative Tagless Copurification: A Method to Validate and Identify Protein-Protein Interactions
Source: PubMed Central journal article supplement (PMC5083090; doi:10.1074/mcp.m115.057117), 2016-04-20
Supplement: 10.1074_M115.057117_mcp.M115.057117-10.pdf [file 10.1074_M115.057117_mcp.M115.057117-10.pdf]

# Dataset S9

MS/MS Spectra for Proteins Identified  
on the Basis of Single Peptide

Shatsky et al.

## Legend

- Spectra representing proteins identified on the basis of single peptide that are not included in the Skyline spectral library are shown.
- Annotated spectra were extracted from ProteinPilot™ result (.group) files.
- The following information is provided at the top of the spectra: protein name\_peptide sequence; m/z value; modifications; missed cleavages; non-tryptic cleavages, if present; match confidence (with 0.99 being the highest possible). Alternative matches for the same spectrum are reported, if applicable. The last line identifies the source .group file.
- Spectra that are annotated as representing “Competitor Proteins” refer to proteins that were identified on the basis spectral evidence for which multiple sequence matches are possible (with identical or very similar confidence). For those cases, an information on a primary match is provided underneath.
- The cases when the same peptide sequence is present in multiple proteins are annotated as “Multiple IDs”.
- Annotation of  $\gamma$ - and  $b$ -type product ions is provided.

### Competitor Protein: DVU0139\_LDEMER

m/z 1096.612 iTRAQ8plex@0; confidence 0.984

Primary ID: DVU0964A\_IDLFR

2D1\_C10\_C12\_S5\_278\_279\_06092009\_(2\_3\_2).group

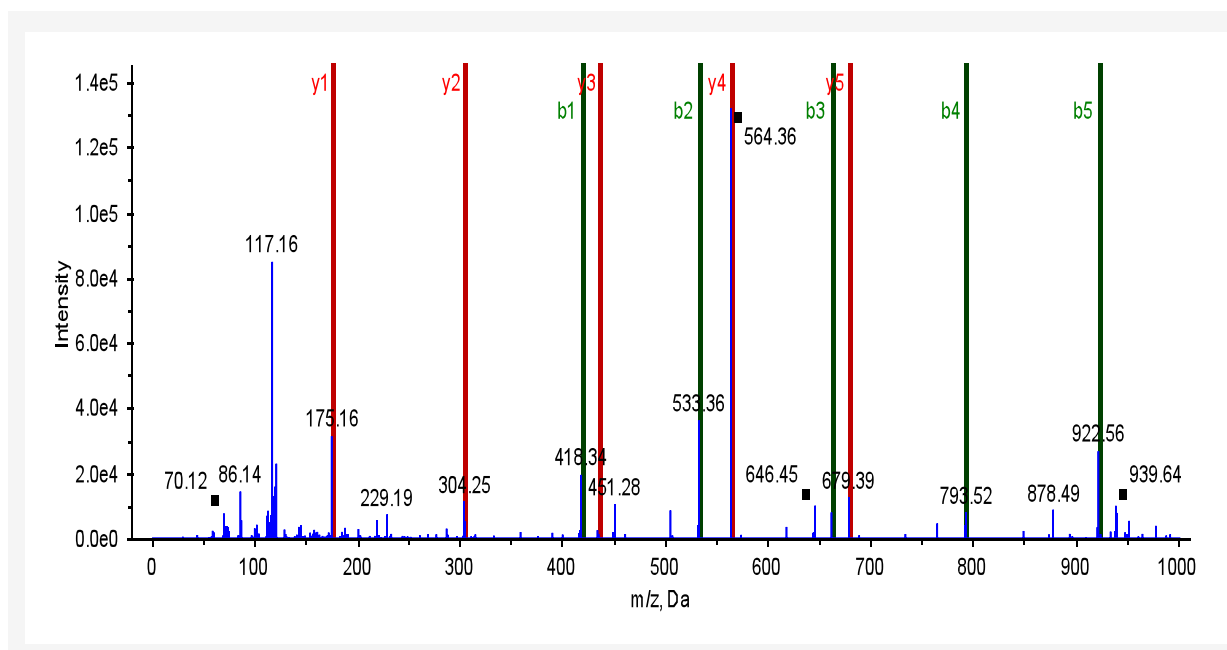

| Residue | b       | y       |
|---------|---------|---------|
| L       | 418.30  | 1096.56 |
| D       | 533.32  | 679.27  |
| E       | 662.37  | 564.24  |
| M       | 793.41  | 435.20  |
| E       | 922.45  | 304.16  |
| R       | 1078.55 | 175.12  |

### DVU0152\_SLIDFFR

m/z 1201.624 iTRAQ8plex@0; cleaved M-S@N-term confidence 0.9697  
1F5\_D4\_2A6\_B11\_S5\_216&231\_03-19-09\_(2\_3\_8).group

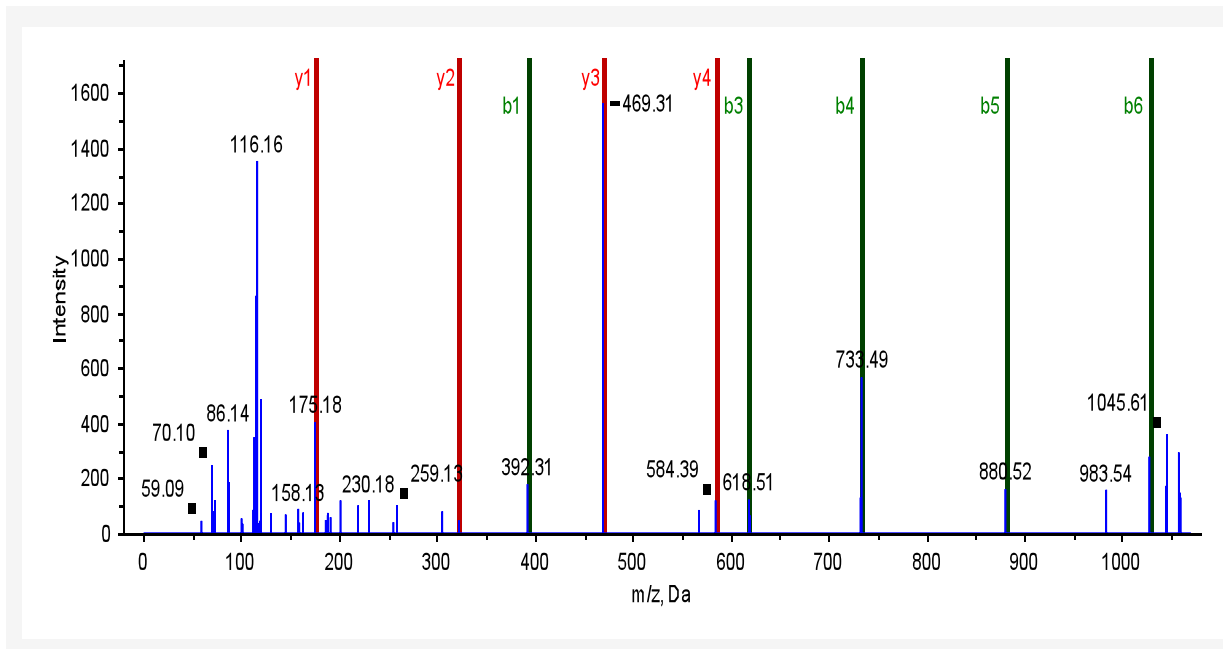

| Residue | b       | y       |
|---------|---------|---------|
| S       | 392.24  | 1201.69 |
| L       | 505.33  | 810.45  |
| I       | 618.41  | 697.37  |
| D       | 733.44  | 584.28  |
| F       | 880.51  | 469.26  |
| F       | 1027.58 | 322.19  |
| R       | 1183.68 | 175.12  |

### Multiple IDs for [L/I][L/I]SK

m/z 1068.722 iTRAQ8plex@4;iTRAQ8plex@0; semitryptic;

confidence 0.9766

**DVU0156, DVU0299, DVU0922, DVU0950, DVU1237, DVU1244, DVU2016, DVU2090, DVU2243,  
DVU2309, DVUA0041, DVUA0138, DVUA0143  
S5\_381-383\_8plex\_1-3\_02-09-10\_(2\_3\_3).group**

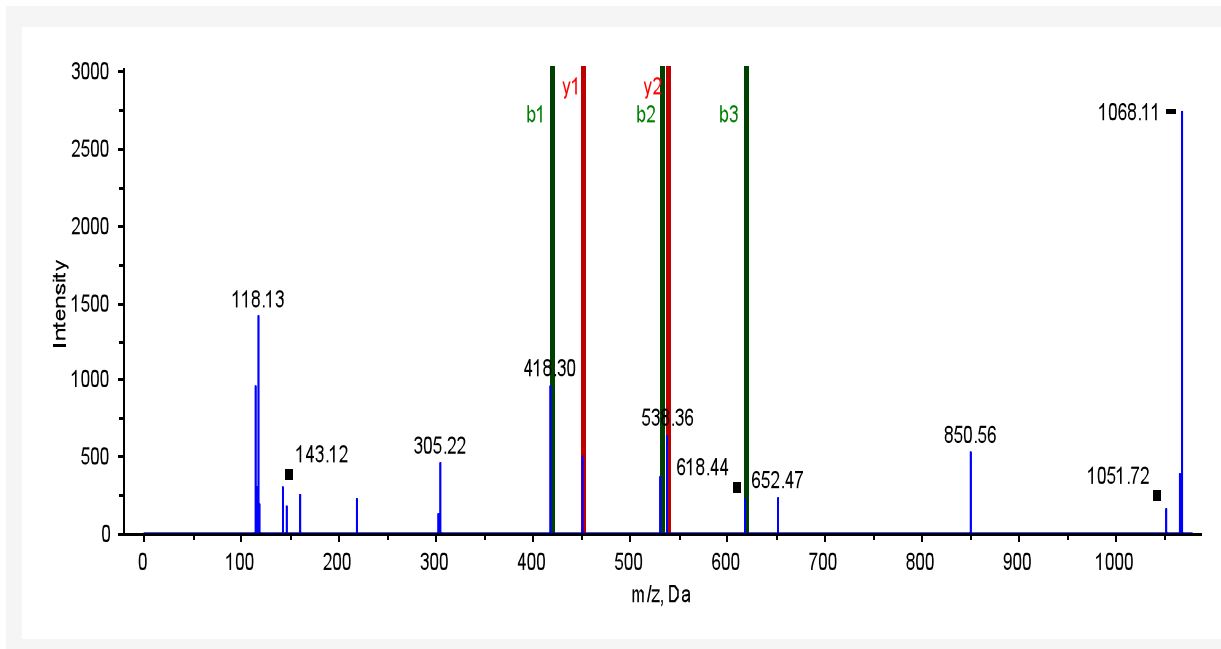

| Residue | b       | y       |
|---------|---------|---------|
| L       | 418.30  | 1068.72 |
| I       | 531.38  | 651.43  |
| S       | 618.41  | 538.35  |
| K[IT8]  | 1050.71 | 451.32  |

**Competitor Protein: DVU0244\_IMSTVR**  
 m/z 1010.594 iTRAQ8plex@0; confidence 0.9622  
 Primary ID: DVU3294A\_LAFTVR  
 S5\_144\_reun\_01-10-2009\_(2\_3\_5)\_(2\_3\_5).group

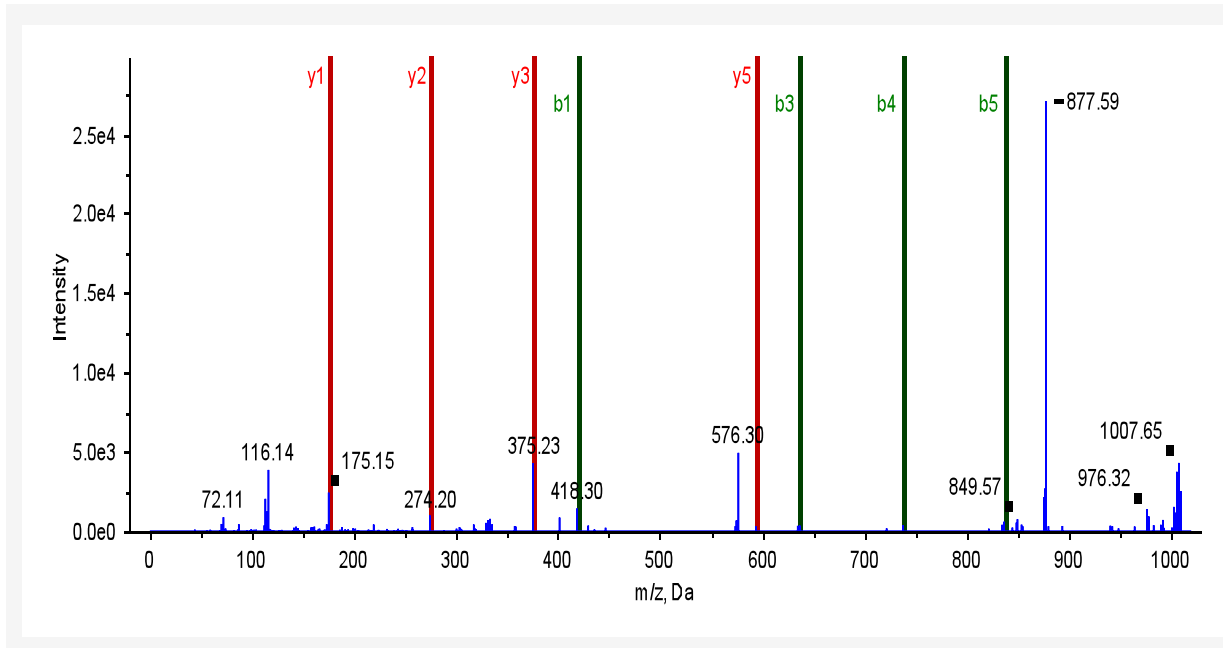

| Residue | b      | y       |
|---------|--------|---------|
| I       | 418.30 | 1010.60 |
| M       | 549.34 | 593.31  |
| S       | 636.37 | 462.27  |
| T       | 737.42 | 375.24  |
| V       | 836.49 | 274.19  |
| R       | 992.59 | 175.12  |

### Multiple IDs for YDLL

DVU0545, DVU0667, DVU0692, DVU0700, DVU1660, DVU1866, DVU1958, DVU1968, DVU2277, DVU3132, DVU3174, DVU3193

m/z 827.4309 iTRAQ8plex@0; confidence 0.99  
1D5\_2D\_SEC\_B13-BC4\_B9\_#2\_rerun\_09242010\_(1\_2\_8)\_(2\_3\_8)\_(2\_3\_5).group

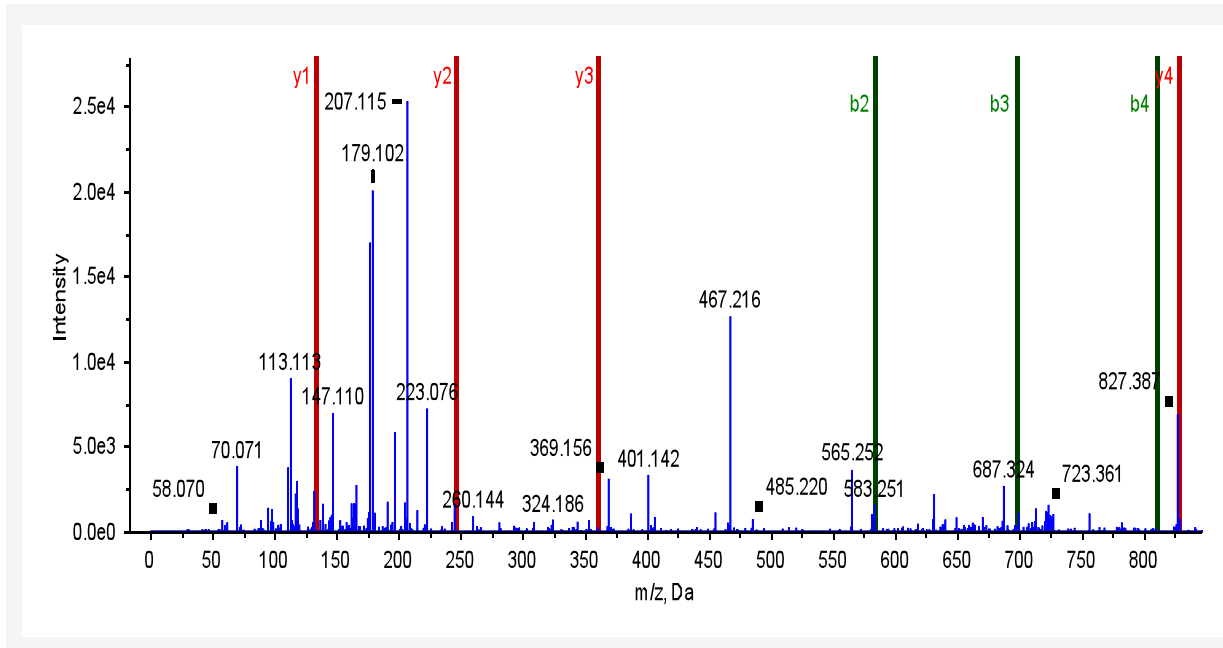

| Residue | b      | y      |
|---------|--------|--------|
| Y       | 468.28 | 827.48 |
| D       | 583.30 | 360.21 |
| L       | 696.39 | 245.19 |
| L       | 809.47 | 132.10 |

### Competitor Protein: DVU0561\_LLDLAR

m/z 1004.645 iTRAQ8plex@0; cleaved W-L@N-term confidence 0.99

Primary ID: DVU1411A\_ILDIAR

G3\_D14\_normal\_3-7\_mini\_7\_07-24-08\_(2\_3\_7).group

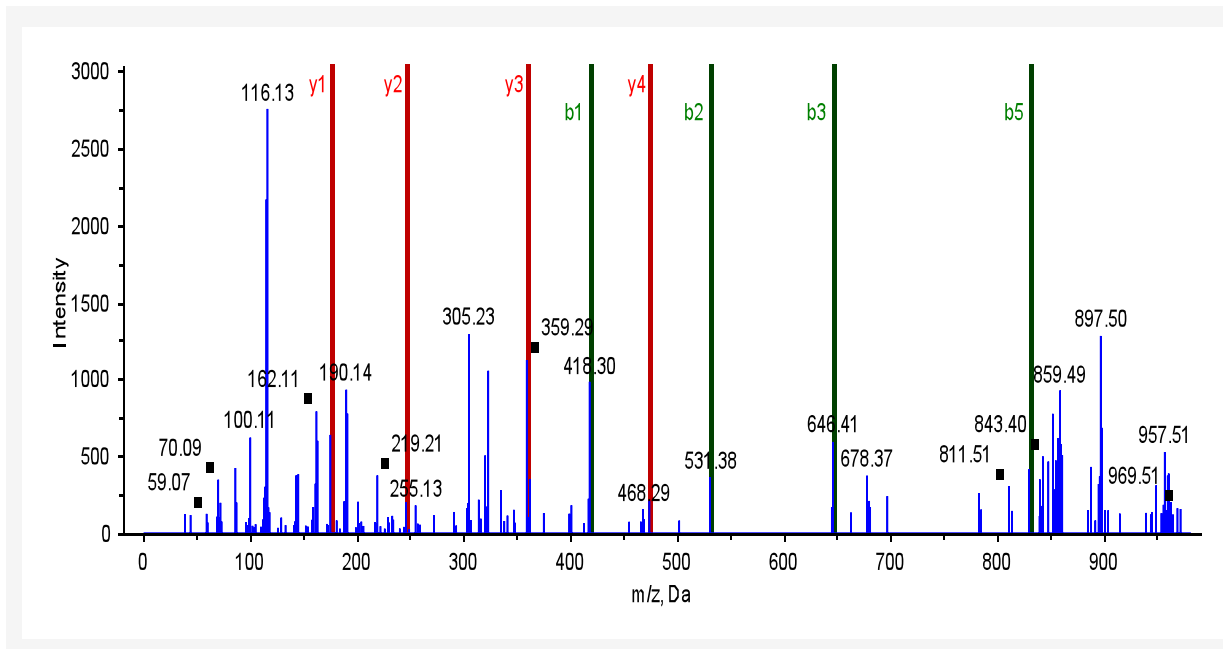

| Residue | b      | y       |
|---------|--------|---------|
| L       | 418.30 | 1004.64 |
| L       | 531.38 | 587.35  |
| D       | 646.41 | 474.27  |
| L       | 759.49 | 359.24  |
| A       | 830.53 | 246.16  |
| R       | 986.63 | 175.12  |



### DVU0561\_NFDLLRALR

m/z 1535.842 Deamidated@1;iTRAQ8plex@0; missed R-A@7 confidence 0.99  
1D7\_2D\_tagless\_SEC\_B3-B11\_04082010\_(2\_3\_1).group

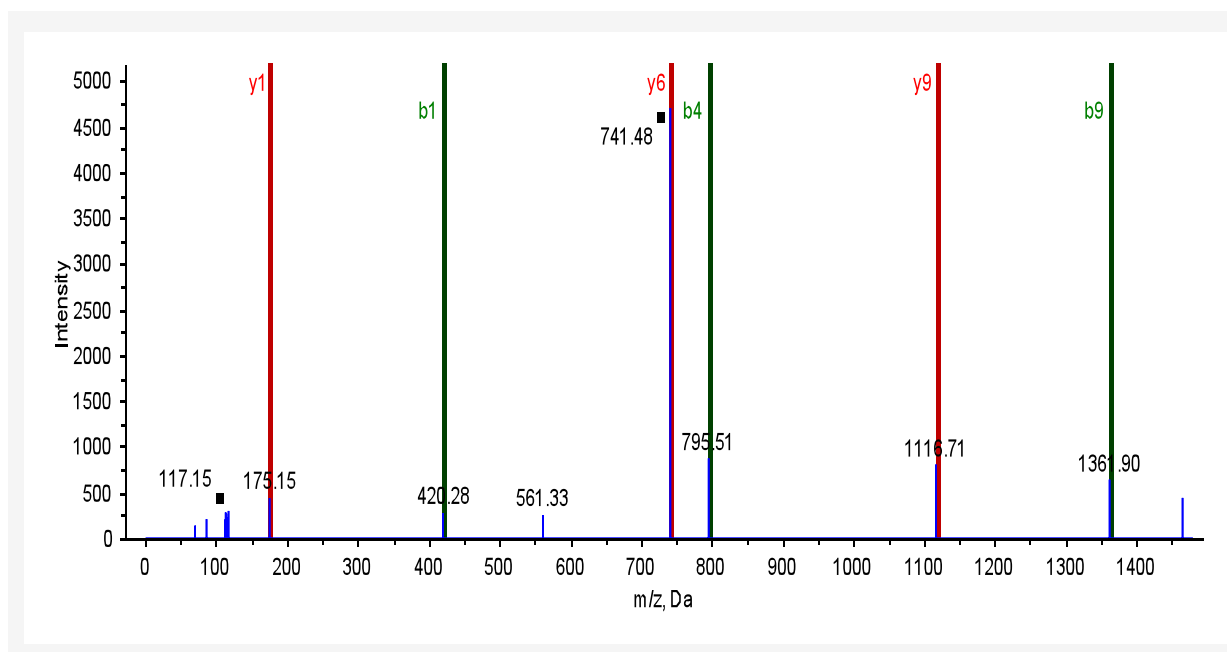

| Residue | b       | y       |
|---------|---------|---------|
| N[Dea]  | 420.24  | 1535.92 |
| F       | 567.31  | 1116.69 |
| D       | 682.33  | 969.62  |
| L       | 795.42  | 854.59  |
| L       | 908.50  | 741.51  |
| L       | 1021.59 | 628.43  |
| R       | 1177.69 | 515.34  |
| A       | 1248.73 | 359.24  |
| L       | 1361.81 | 288.20  |
| R       | 1517.91 | 175.12  |

**Multiple IDs for LFLLYR:**

m/z 1128.754

iTRAQ8plex@0;

semityptic confidence 0.99

**DVU0570, DVU0670**

2A3\_C8\_C10\_S5\_221\_222\_02-24-2009\_(2\_3\_2)\_(2\_3\_2).group

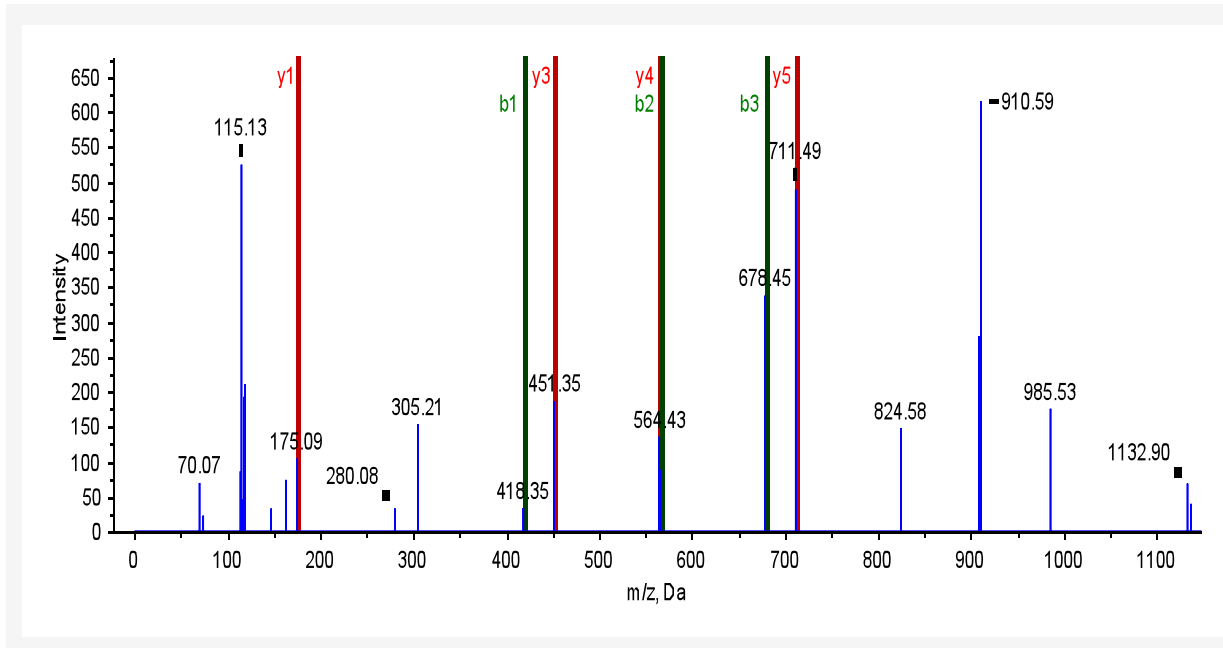

| Residue | b       | y       |
|---------|---------|---------|
| L       | 418.30  | 1128.71 |
| F       | 565.37  | 711.42  |
| L       | 678.45  | 564.35  |
| L       | 791.53  | 451.27  |
| Y       | 954.60  | 338.18  |
| R       | 1110.70 | 175.12  |

**Competitor Protein: DVU0608\_EAEAARAQAENARR**

m/z 1847.933 Deamidated@11;iTRAQ8plex@0; missed R-A@6; missed R-R@13 confidence 0.98  
 Primary ID: DORF26948\_VLEGASRGWCPRR 1F5\_C8\_C10\_S5\_211\_212\_20090219\_(3\_4\_2)\_(2\_3\_2).group

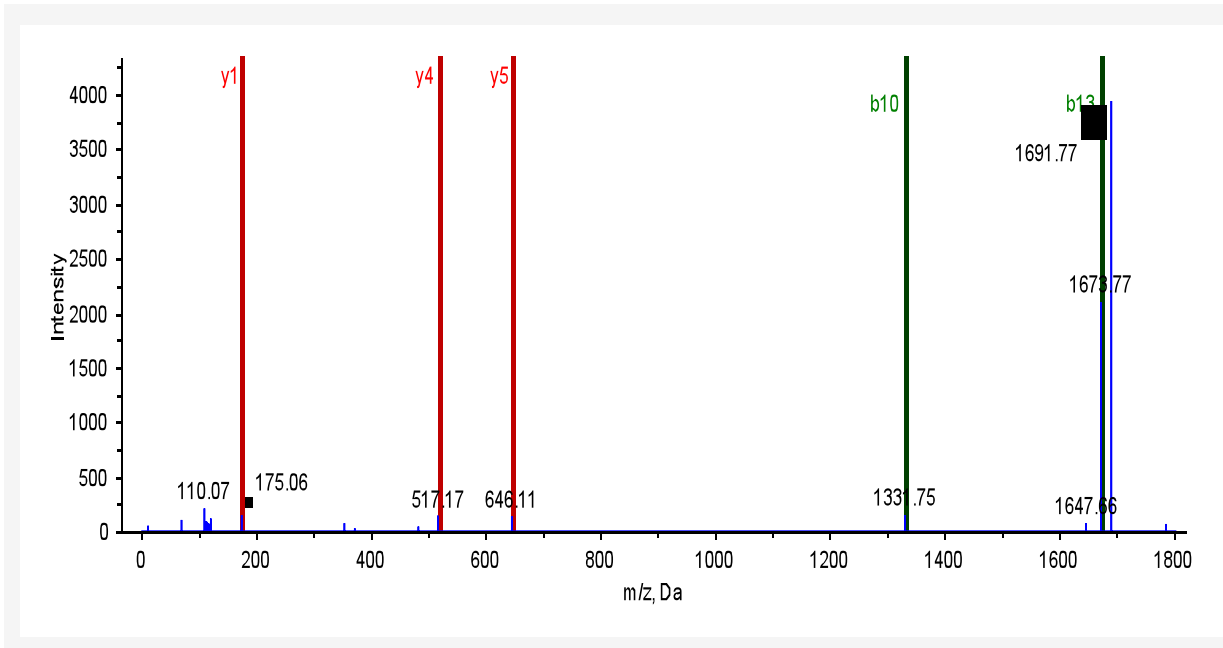

| Residue | b       | y       |
|---------|---------|---------|
| E       | 434.26  | 1847.96 |
| A       | 505.29  | 1414.71 |
| E       | 634.33  | 1343.68 |
| A       | 705.37  | 1214.63 |
| A       | 776.41  | 1143.60 |
| R       | 932.51  | 1072.56 |
| A       | 1003.55 | 916.46  |
| Q       | 1131.61 | 845.42  |
| A       | 1202.64 | 717.36  |
| E       | 1331.69 | 646.33  |
| N[Dea]  | 1446.71 | 517.28  |
| A       | 1517.75 | 402.26  |
| R       | 1673.85 | 331.22  |
| R       | 1829.95 | 175.12  |

### Competitor Protein: DVU0635\_LLDGLGAPR

m/z 1215.74 iTRAQ8plex@0; confidence 0.9805

Primary ID: DVU0085A\_LIGVEPAGR

MonoQ\_2A3\_S5\_142\_2D\_SEC\_B11-C2\_120409\_(2\_3\_7).group

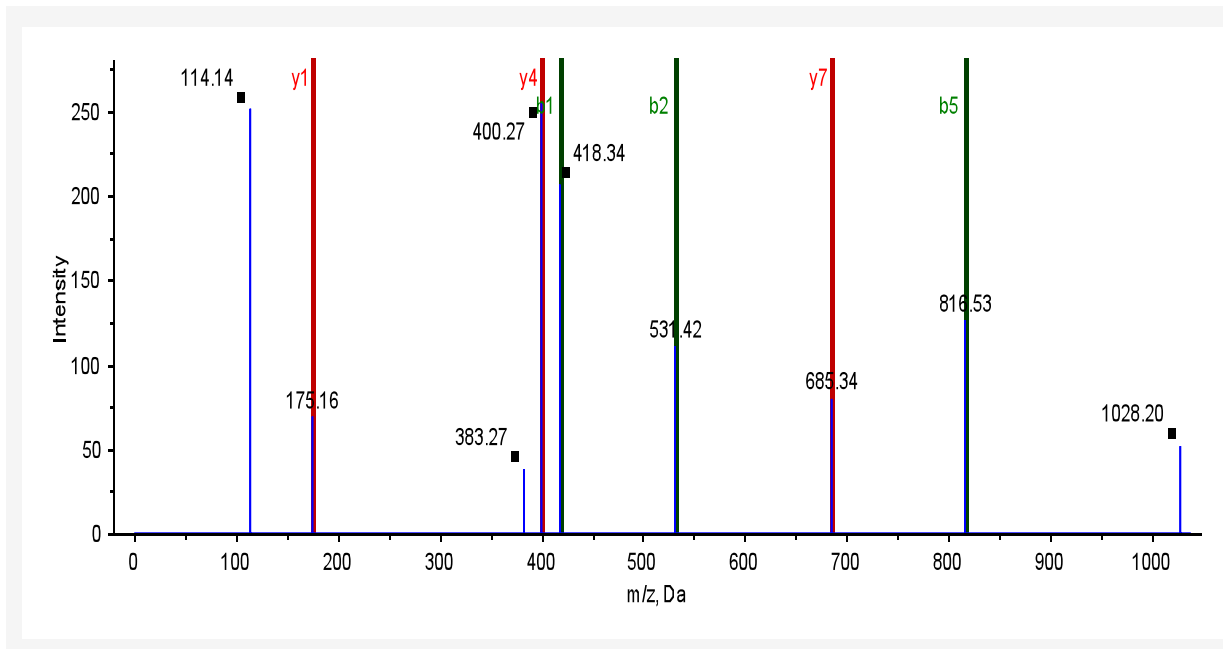

| Residue | b       | y       |
|---------|---------|---------|
| L       | 418.30  | 1215.74 |
| L       | 531.38  | 798.45  |
| D       | 646.41  | 685.36  |
| G       | 703.43  | 570.34  |
| L       | 816.51  | 513.31  |
| G       | 873.53  | 400.23  |
| A       | 944.57  | 343.21  |
| P       | 1041.62 | 272.17  |
| R       | 1197.73 | 175.12  |

### Competitor Protein:DVU0653\_YRWPGNVR

m/z 1351.755 iTRAQ8plex@0; cleaved A-Y@N-term; missed R-W@2 0.99  
Primary ID: DVU2934\_YRWPGNVR 2C2\_C10\_C12\_S5\_333\_331\_082509\_(3\_4\_4).group

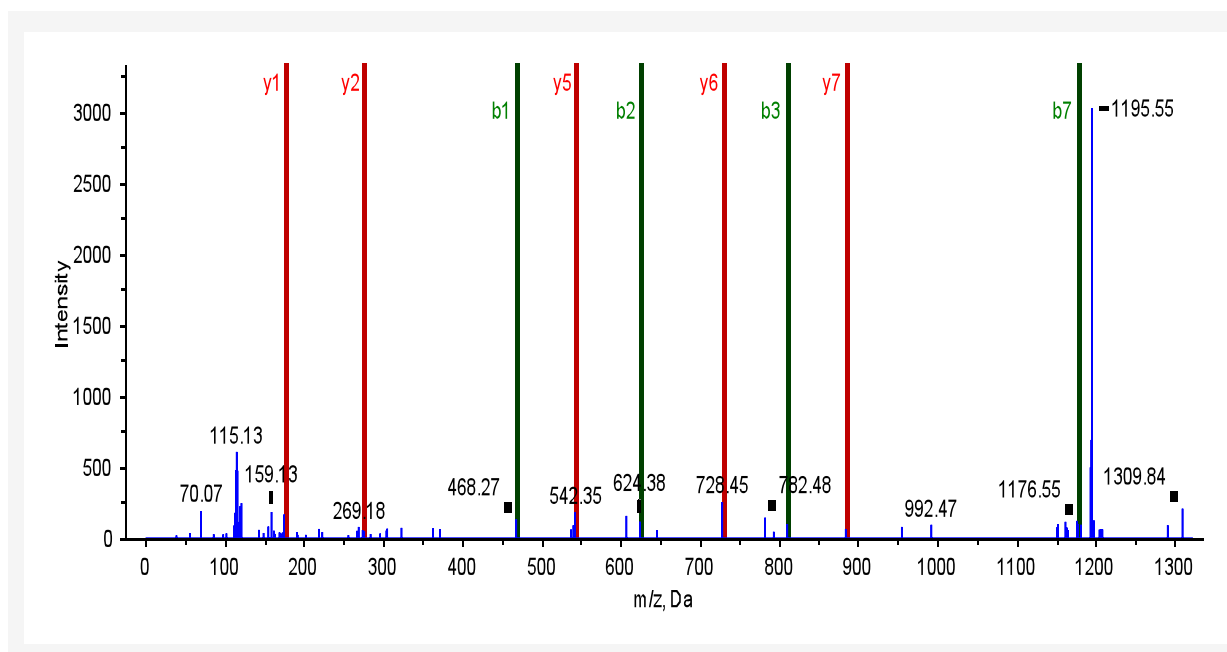

| Residue | b       | y       |
|---------|---------|---------|
| Y       | 468.28  | 1351.75 |
| R       | 624.38  | 884.48  |
| W       | 810.46  | 728.38  |
| P       | 907.51  | 542.30  |
| G       | 964.53  | 445.25  |
| N       | 1078.57 | 388.23  |
| V       | 1177.64 | 274.19  |
| R       | 1333.74 | 175.12  |

### Competitor Protein DVU0680\_IDVFR

m/z 953.5557 iTRAQ8plex@0; cleaved A-I@N-term confidence 0.99

Primary ID: DVU1861\_IDVFR

S5\_466-468\_rerun\_zt\_111210\_(2\_3\_6).group

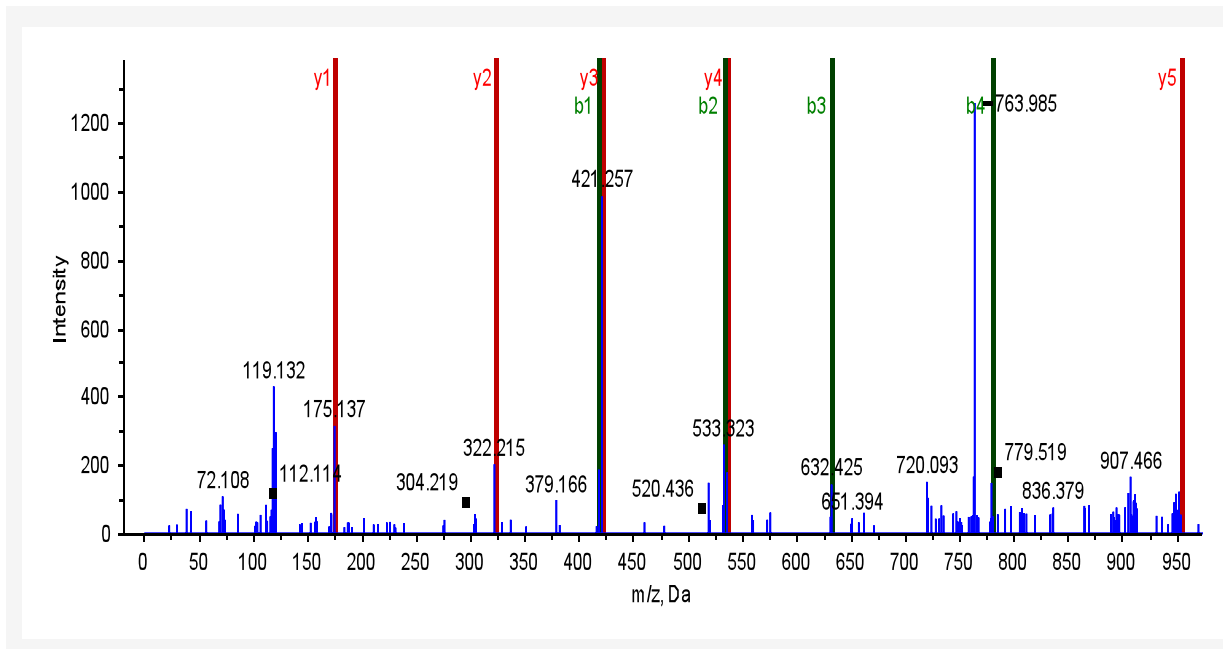

| Residue | b      | y      |
|---------|--------|--------|
| I       | 418.30 | 953.57 |
| D       | 533.32 | 536.28 |
| V       | 632.39 | 421.26 |
| F       | 779.46 | 322.19 |
| R       | 935.56 | 175.12 |

### Competitor Protein:DVU0750\_TIDSMR

m/z 1026.59 iTRAQ8plex@0; confidence 0.99

Primary ID: DVU1203\_TIDFAR

2A6\_B14\_C2\_S5\_232\_233\_rerun\_04-01-09\_(2\_3\_4)\_(2\_3\_5).group

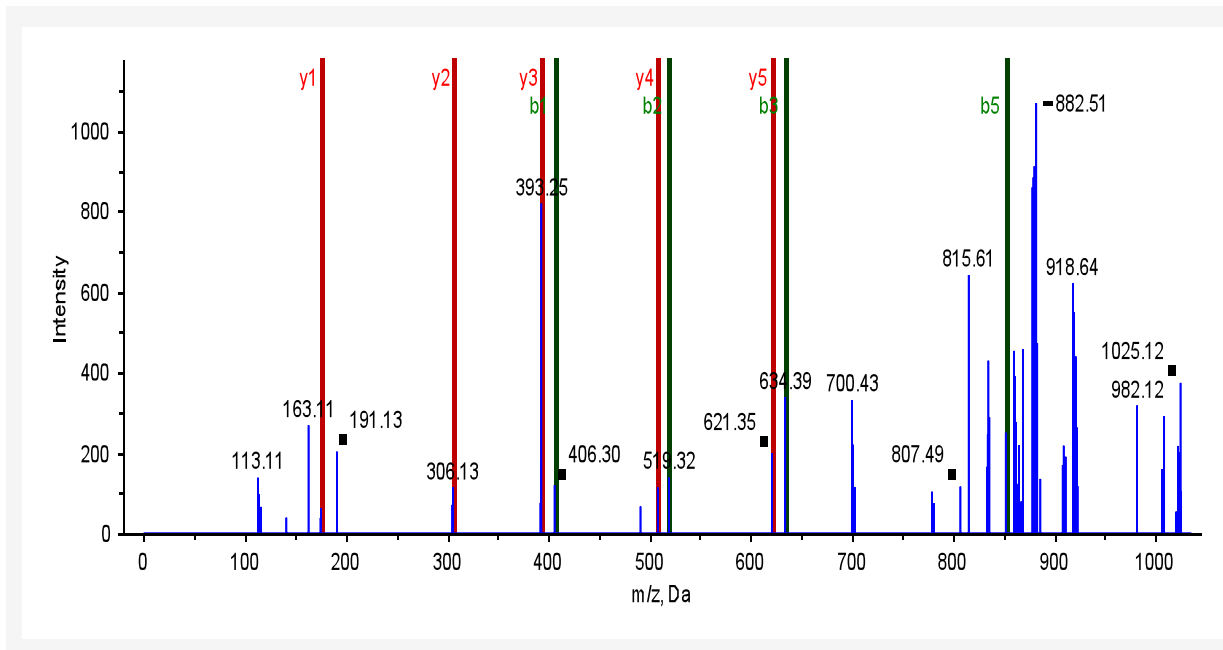

| Residue | b       | y       |
|---------|---------|---------|
| T       | 406.26  | 1026.56 |
| I       | 519.34  | 621.30  |
| D       | 634.37  | 508.22  |
| S       | 721.40  | 393.19  |
| M       | 852.44  | 306.16  |
| R       | 1008.54 | 175.12  |

**Competitor Protein: DVU0804\_GAFRQDLLYR**

m/z 1543.993

Deamidated@5;iTRAQ8plex@0; missed R-Q@4

confidence 0.99

Primary ID: DVU1300\_KENLK

2D4\_C5\_S5\_291\_relabeled\_092509\_(2\_3\_12).group

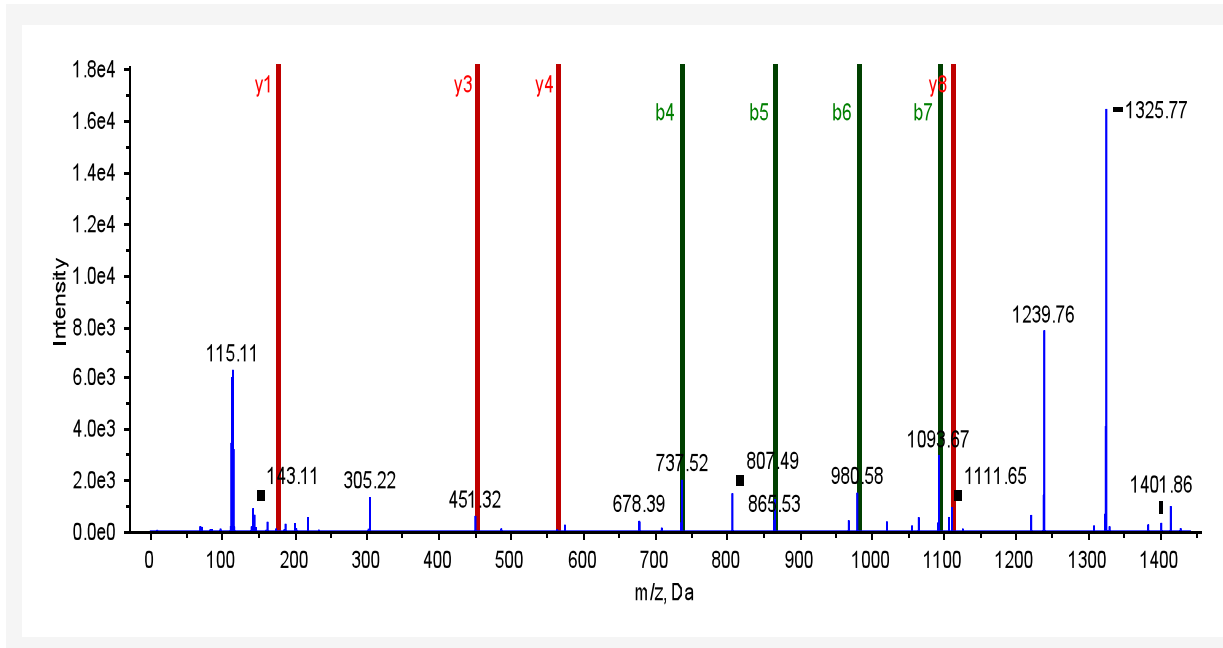

| Residue | b       | y       |
|---------|---------|---------|
| G       | 362.23  | 1543.85 |
| A       | 433.27  | 1182.63 |
| F       | 580.34  | 1111.59 |
| R       | 736.44  | 964.52  |
| Q[Dea]  | 865.48  | 808.42  |
| D       | 980.51  | 679.38  |
| L       | 1093.59 | 564.35  |
| L       | 1206.68 | 451.27  |
| Y       | 1369.74 | 338.18  |
| R       | 1525.84 | 175.12  |



### Competitor Protein: DVU0818\_HAGTPTAAAR

m/z 1256.683 iTRAQ8plex@0; confidence 0.9756

Primary ID: DVU1419\_HSWPGNVR

1F5\_C12\_S5\_213\_20090306\_(2\_3\_6).group

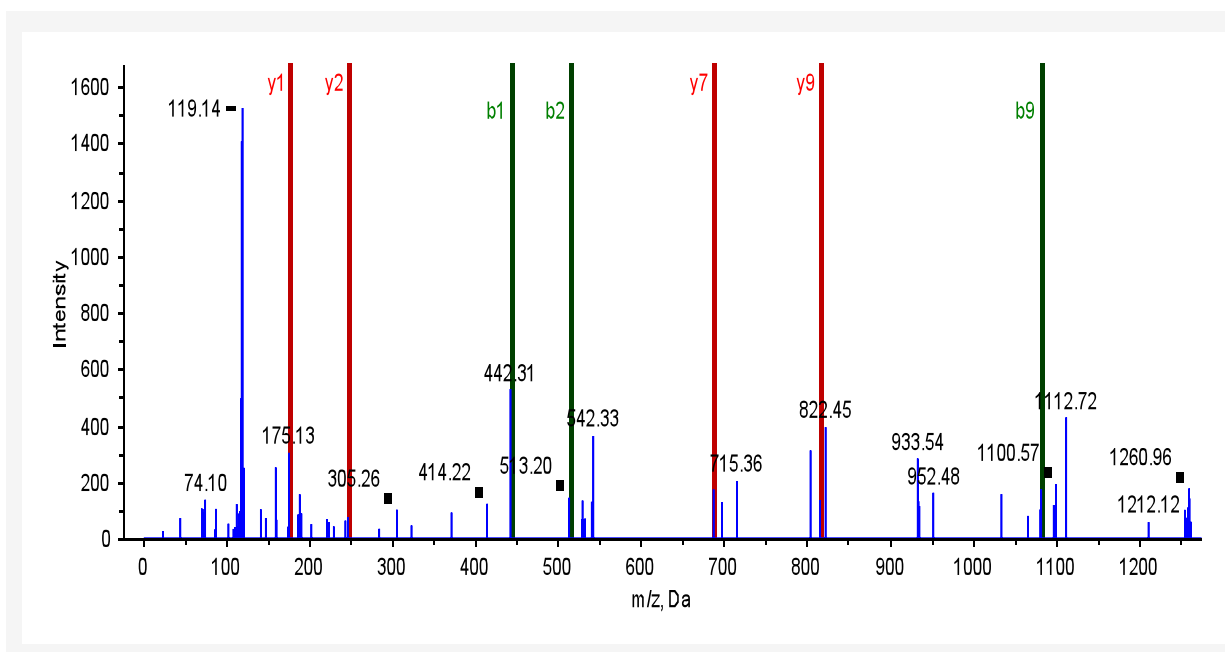

| Residue | b       | y       |
|---------|---------|---------|
| H       | 442.27  | 1256.70 |
| A       | 513.31  | 815.44  |
| G       | 570.33  | 744.40  |
| T       | 671.38  | 687.38  |
| P       | 768.43  | 586.33  |
| T       | 869.48  | 489.28  |
| A       | 940.52  | 388.23  |
| A       | 1011.55 | 317.19  |
| A       | 1082.59 | 246.16  |
| R       | 1238.69 | 175.12  |

### Competitor Protein: DVU0888\_IANALK

m/z 1237.823

iTRAQ8plex@6;iTRAQ8plex@0;

cleaved L-I@N-term

confidence 0.9716

Primary ID: DVU2250A\_LANALK

AS2\_613-615\_05292012\_(2\_3\_2).group

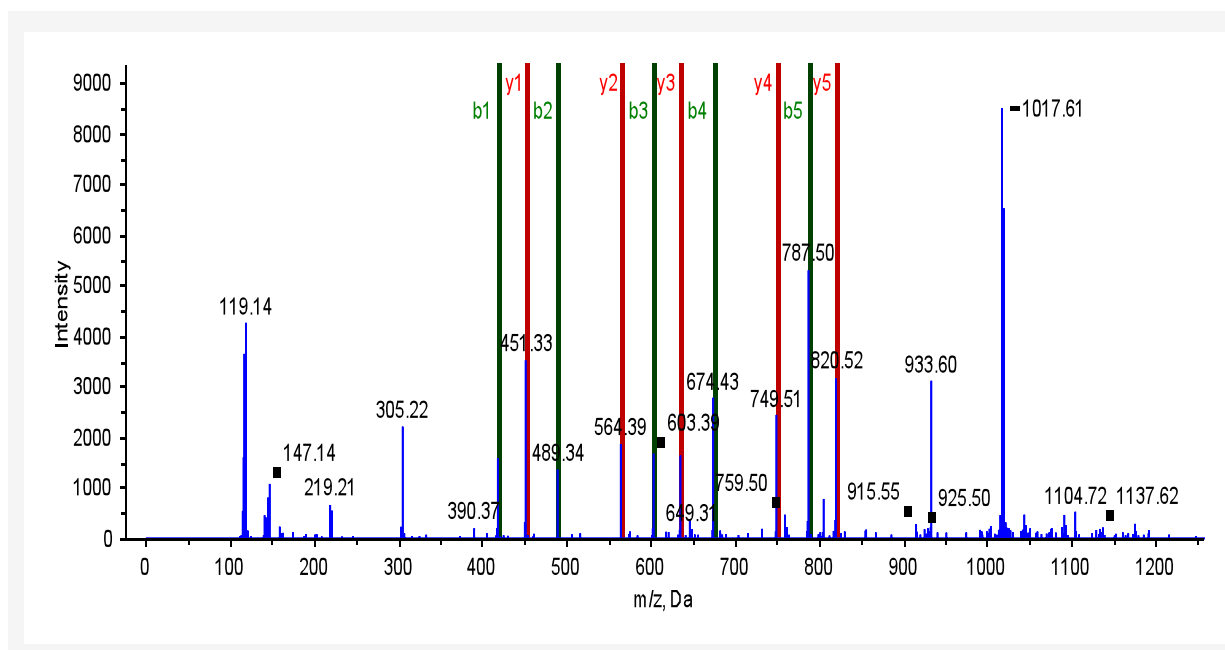

| Residue | b       | y       |
|---------|---------|---------|
| I       | 418.30  | 1237.81 |
| A       | 489.33  | 820.52  |
| N       | 603.38  | 749.48  |
| A       | 674.41  | 635.44  |
| L       | 787.50  | 564.40  |
| K[IT8]  | 1219.80 | 451.32  |

**Competitor Protein: DVU0947\_SRILL**

m/z 905.6853

iTRAQ8plex@0;

cleaved L-S@N-term; cleaved L-G@C-term; missed R-I@2

confidence 0.99

Primary ID: DVU2336\_AGDLIL

1E6\_2D\_SEC\_B13-C6\_08242010\_(3\_4\_4)\_(3\_4\_3).group

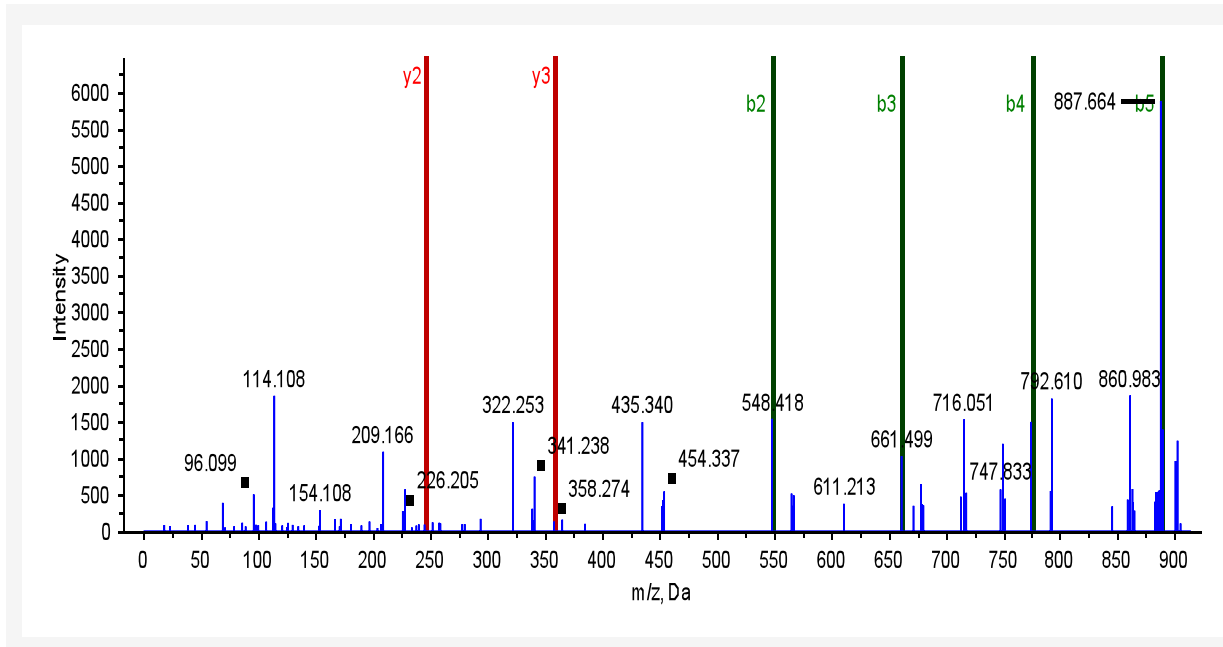

| Residue | b        | y        |
|---------|----------|----------|
| S       | 392.2447 | 905.6085 |
| R       | 548.3458 | 514.3711 |
| I       | 661.4298 | 358.27   |
| L       | 774.5139 | 245.186  |
| L       | 887.598  | 132.1019 |

### Multiple Competitor Proteins for LLPDR

m/z 917.6387 iTRAQ8plex@0; semitryptic confidence 0.9601

DVU0998, DVU2396, DVU2501, DVU3267

Primary ID: DVU3294\_LIVLR

S5\_405-407\_04232010\_(2\_3\_6).group

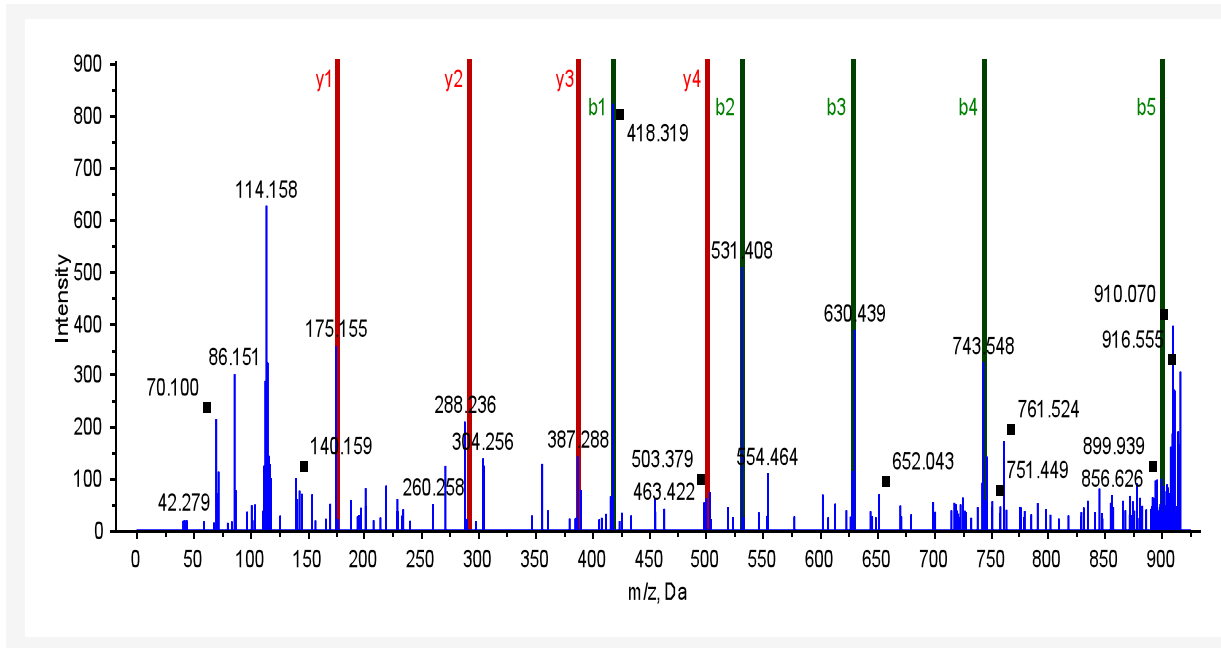

| Residue | b      | y      |
|---------|--------|--------|
| L       | 418.30 | 917.57 |
| L       | 531.38 | 500.28 |
| P       | 628.43 | 387.20 |
| D       | 743.46 | 290.15 |
| R       | 899.56 | 175.12 |

### Competitor Protein: DVU1019\_YFALK

m/z 1249.743 iTRAQ8plex@5;iTRAQ8plex@0; confidence 0.9717

Primary ID: DVU3025\_YSMMLK

2D1\_2D\_tagless\_SEC\_B13-C6\_05-14-2010\_(3\_4\_2).group

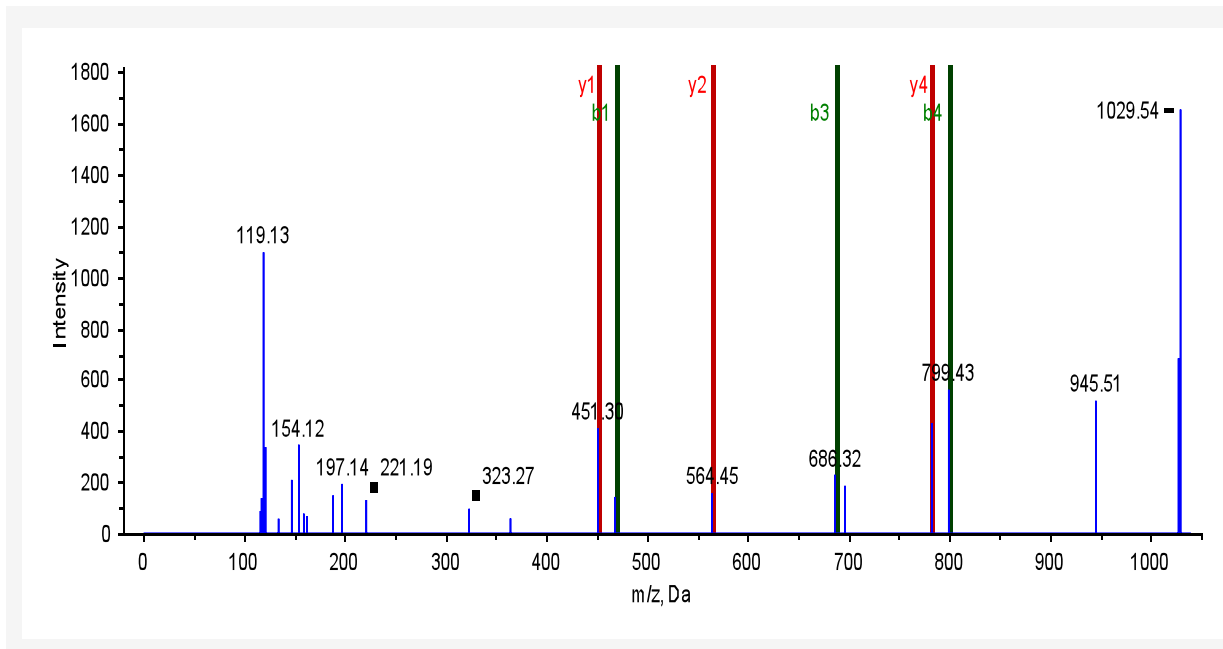

| Residue | b       | y       |
|---------|---------|---------|
| Y       | 468.28  | 1249.78 |
| F       | 615.34  | 782.51  |
| A       | 686.38  | 635.44  |
| L       | 799.47  | 564.40  |
| K[IT8]  | 1231.77 | 451.32  |

**Competitor Protein: DVU1065\_TLGLK**

m/z 1139.755

iTRAQ8plex@5;iTRAQ8plex@0;

cleaved A-T@N-term; cleaved K-P@C-term

confidence 0.9574

Primary ID: DVU1950\_TLGLK

SEC\_B11B13\_&\_C4C6\_HIC\_combos\_B13-D7\_091109\_(2\_3\_4).group

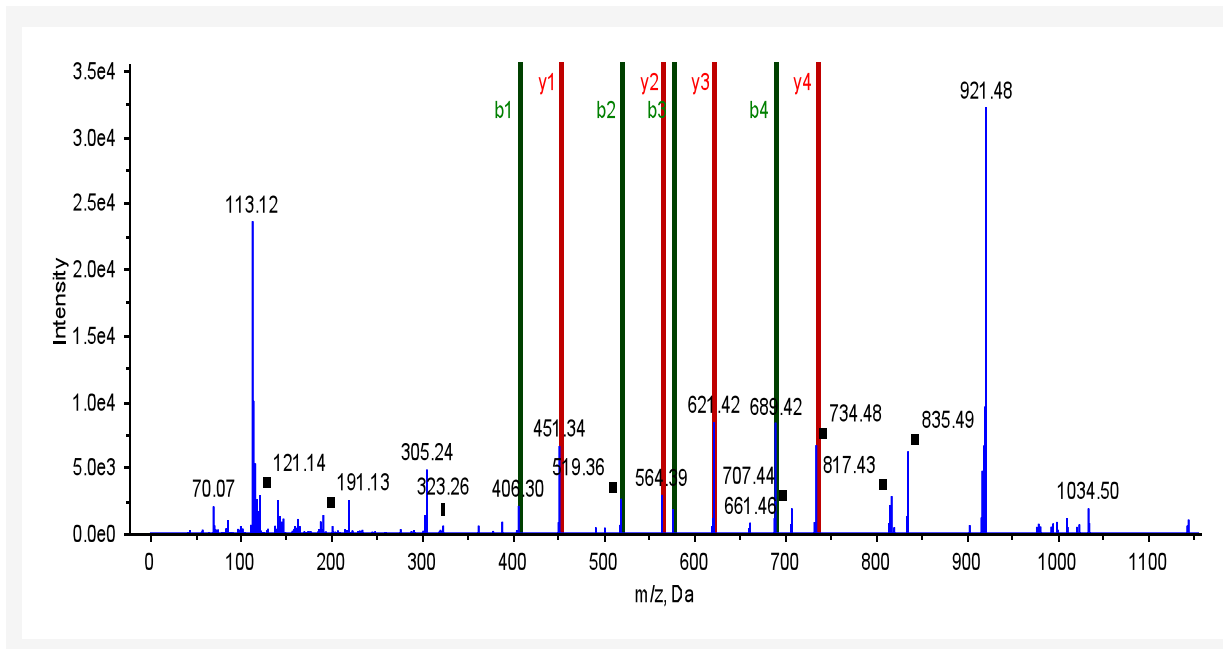

| Residue | b       | y       |
|---------|---------|---------|
| T       | 406.26  | 1139.76 |
| L       | 519.34  | 734.51  |
| G       | 576.37  | 621.42  |
| L       | 689.45  | 564.40  |
| K[IT8]  | 1121.75 | 451.32  |

### DVU1290\_NTSMEIQNGPR

m/z 1566.684 Oxidation@4;iTRAQ8plex@0; confidence 0.99  
2B6\_2D\_SEC\_B12-C5\_03082011\_(2\_3\_10).group

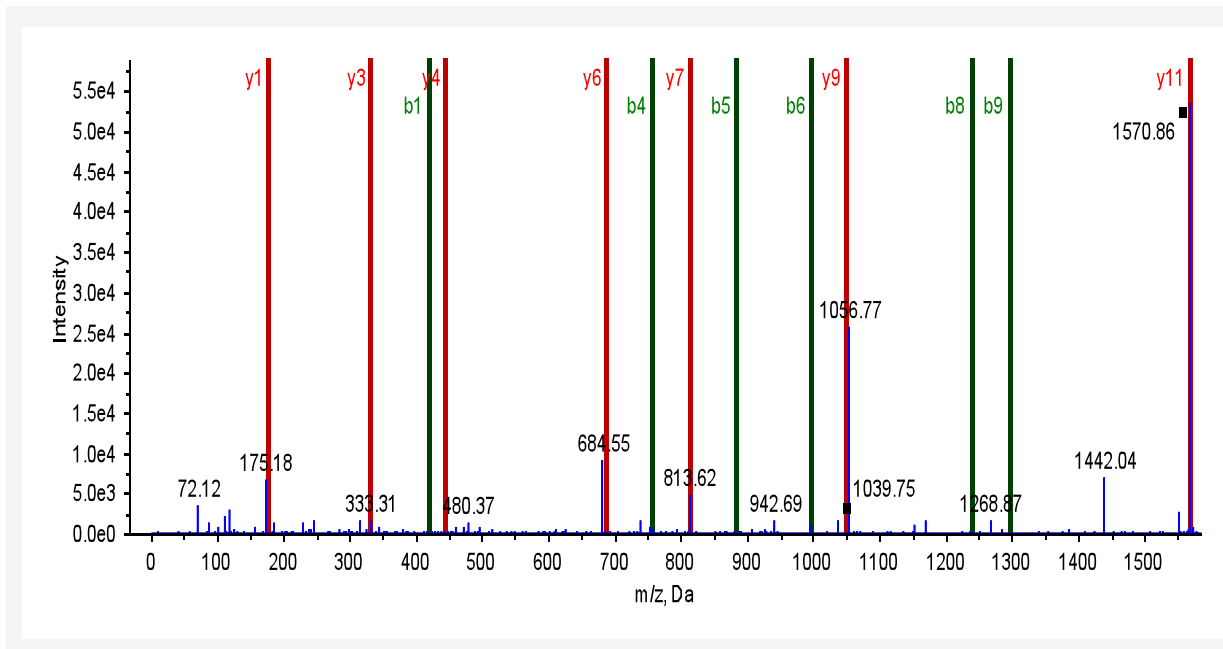

| Residue | b       | y       |
|---------|---------|---------|
| N       | 419.26  | 1566.78 |
| T       | 520.30  | 1148.54 |
| S       | 607.34  | 1047.49 |
| M[Oxi]  | 754.37  | 960.46  |
| E       | 883.41  | 813.42  |
| I       | 996.50  | 684.38  |
| Q       | 1124.56 | 571.29  |
| N       | 1238.60 | 443.24  |
| G       | 1295.62 | 329.19  |
| P       | 1392.67 | 272.17  |
| R       | 1548.77 | 175.12  |

### Multiple IDs (confidence 0.99):

DVU1012\_IDIK 1096.979 iTRAQ8plex@4;iTRAQ8plex@0; cleaved N-I@N-term  
 DVU2812\_IDIK 1096.979 iTRAQ8plex@4;iTRAQ8plex@0; cleaved W-I@N-term  
 S5\_256\_258\_261\_265\_selected\_4plexes\_relabeled\_092509\_(2\_3\_1).group

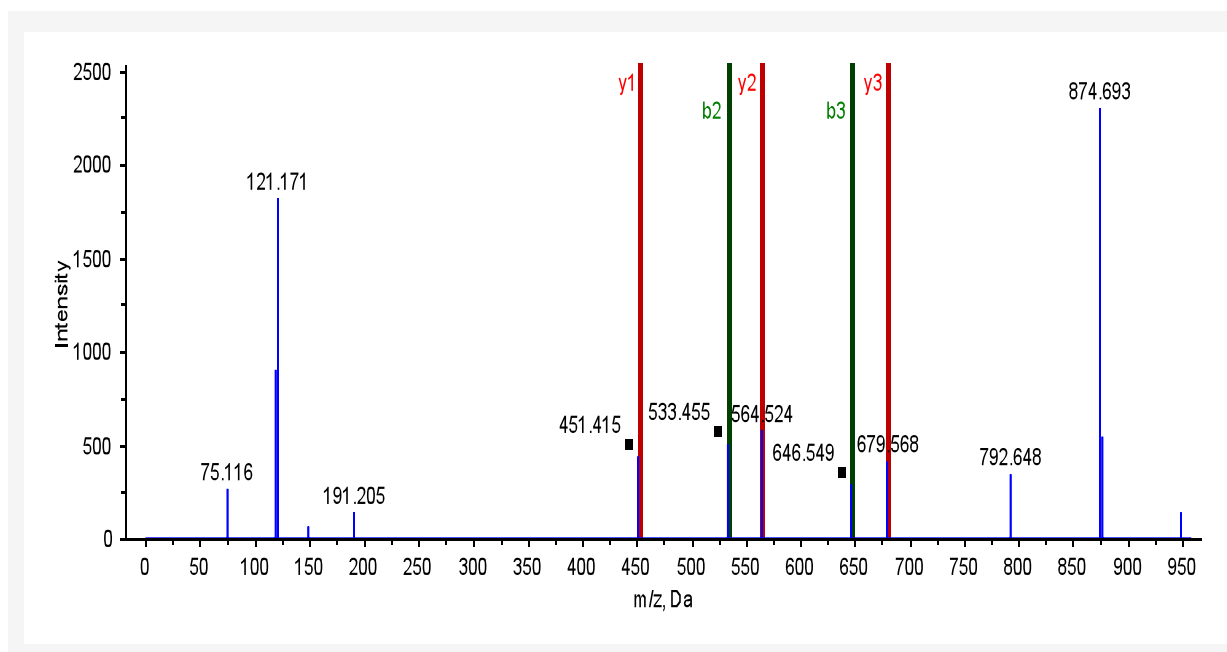

| Residue | b       | y       |
|---------|---------|---------|
| I       | 418.30  | 1096.72 |
| D       | 533.32  | 679.43  |
| I       | 646.41  | 564.40  |
| K[IT8]  | 1078.71 | 451.32  |



### Multiple IDs for SRLAERLDGPHR: DVU1398, DVU2030, DVU2178

m/z 1711.001 iTRAQ8plex@0; missed R-L@2; missed R-L@6 confidence 0.99  
 AS1\_1D2\_633\_2D\_SEC\_C5\_06182012\_(3\_4\_2).group

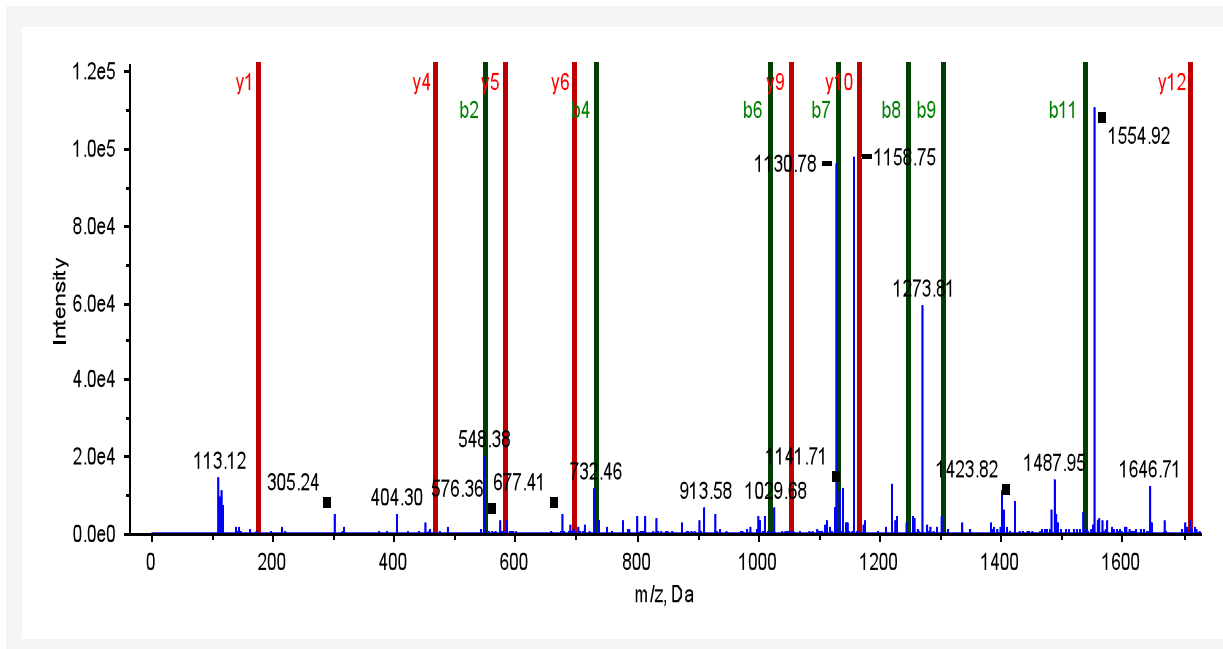

| Residue | b       | y       |
|---------|---------|---------|
| S       | 392.24  | 1710.97 |
| R       | 548.35  | 1319.73 |
| L       | 661.43  | 1163.63 |
| A       | 732.47  | 1050.54 |
| E       | 861.51  | 979.51  |
| R       | 1017.61 | 850.46  |
| L       | 1130.69 | 694.36  |
| D       | 1245.72 | 581.28  |
| G       | 1302.74 | 466.25  |
| P       | 1399.8  | 409.23  |
| H       | 1536.85 | 312.18  |
| R       | 1692.96 | 175.12  |

### Competitor Protein: DVU1435\_AGAGGIK

m/z 1294.85 iTRAQ8plex@8;iTRAQ8plex@0; confidence 0.99

Primary ID: DVU0881\_AEILLK

2D4\_C5\_S5\_291\_relabeled\_092509\_(2\_3\_11).group

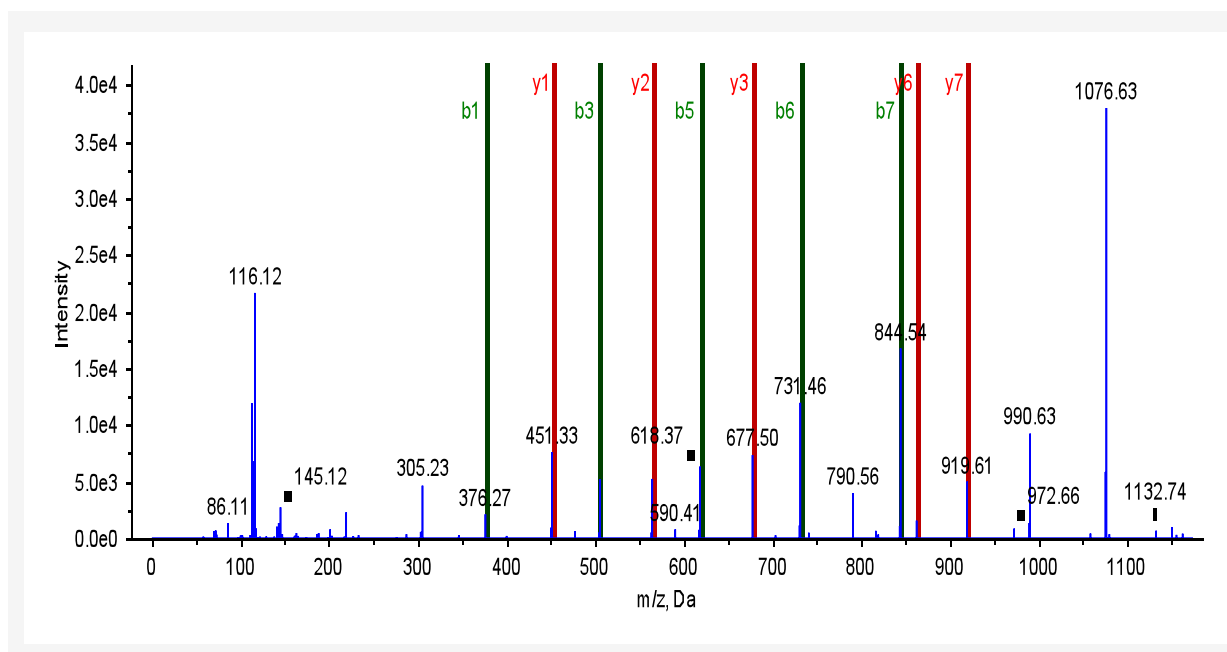

| Residue | b       | y       |
|---------|---------|---------|
| A       | 376.25  | 1294.83 |
| G       | 433.27  | 919.59  |
| A       | 504.31  | 862.57  |
| G       | 561.33  | 791.53  |
| G       | 618.35  | 734.51  |
| I       | 731.44  | 677.49  |
| I       | 844.52  | 564.40  |
| K[IT8]  | 1276.82 | 451.32  |

**Competitor Protein: DVU1516\_DARALK**

m/z 1281.779

iTRAQ8plex@6;iTRAQ8plex@0;

cleaved T-D@N-term; missed R-A@3 confidence

0.9578

Primary ID: DVU1976\_NPMAIK

2B6\_D5\_D7\_S5\_289\_290\_06162009\_(2\_3\_4).group

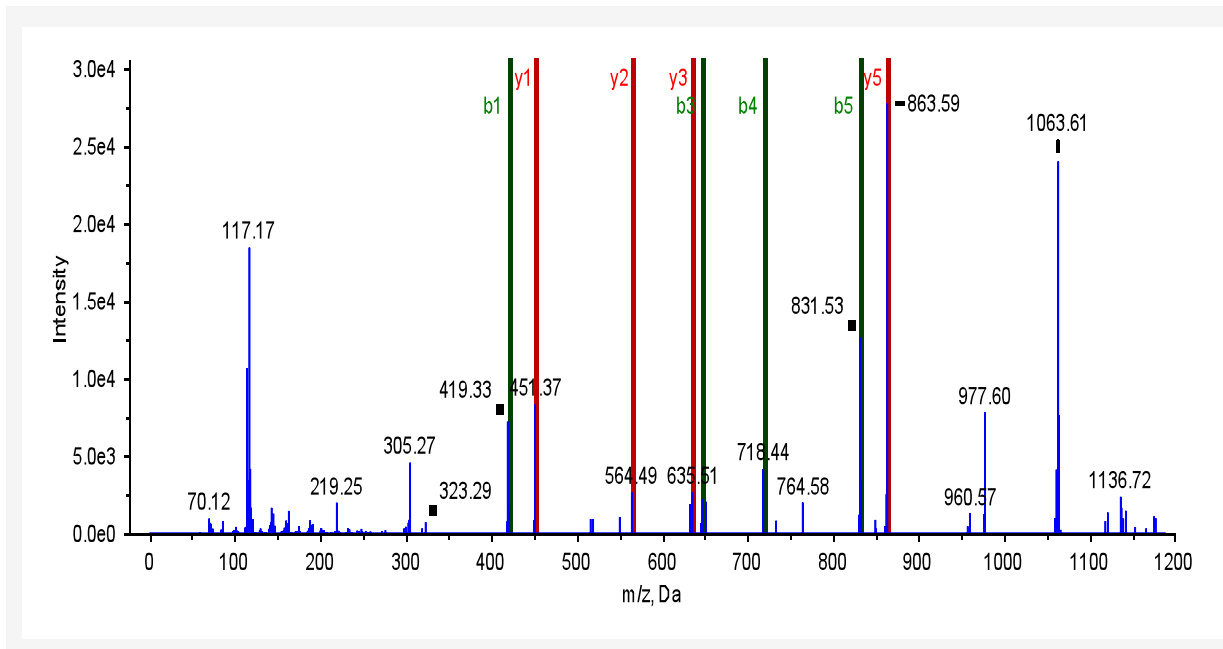

| Residue | b       | y       |
|---------|---------|---------|
| D       | 420.24  | 1281.81 |
| A       | 491.28  | 862.58  |
| R       | 647.38  | 791.54  |
| A       | 718.41  | 635.44  |
| L       | 831.50  | 564.40  |
| K[IT8]  | 1263.80 | 451.32  |

### Competitor Protein: DVU1553\_ALLAER

m/z 976.6179 iTRAQ8plex@0; cleaved D-A@N-term confidence 0.9532

Primary ID: DVU1419\_ALILSR

1F5\_C8\_C10\_S5\_211\_212\_20090219\_(3\_4\_6)\_(2\_3\_6).group

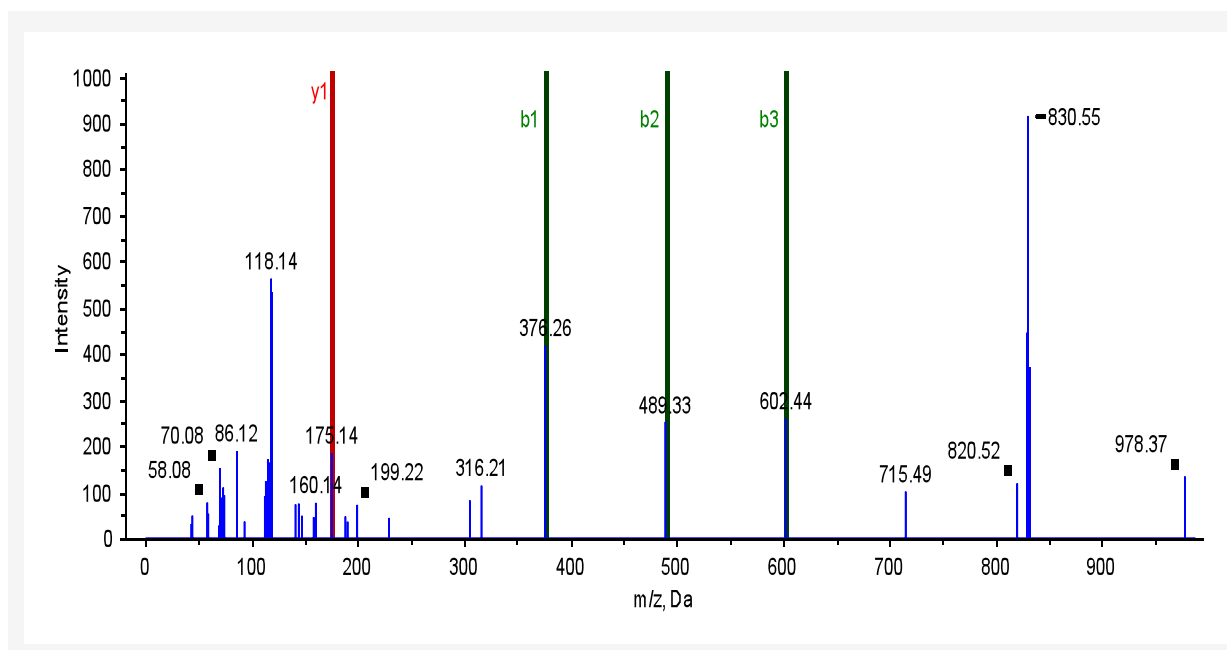

| Residue | b      | y      |
|---------|--------|--------|
| A       | 376.25 | 976.61 |
| L       | 489.33 | 601.37 |
| L       | 602.42 | 488.28 |
| A       | 673.46 | 375.20 |
| E       | 802.50 | 304.16 |
| R       | 958.60 | 175.12 |

### DVU1641\_VDTMSRHIDLR

m/z 1646.913 iTRAQ8plex@0; missed R-H@6 confidence 0.99  
 2E6\_2D\_SEC\_B11\_#2\_B13-C4\_14Feb2011\_(2\_3\_8).group

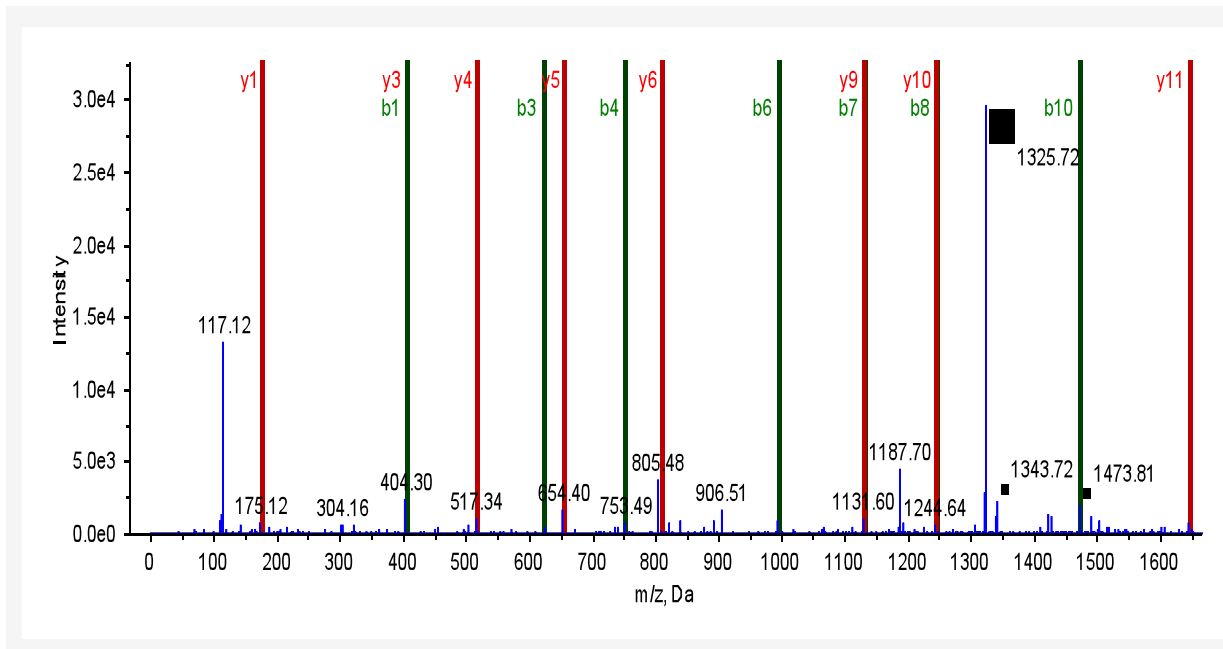

| Residue | b       | y       |
|---------|---------|---------|
| V       | 404.28  | 1646.9  |
| D       | 519.31  | 1243.62 |
| T       | 620.36  | 1128.59 |
| M       | 751.4   | 1027.55 |
| S       | 838.43  | 896.51  |
| R       | 994.53  | 809.47  |
| H       | 1131.59 | 653.37  |
| I       | 1244.67 | 516.31  |
| D       | 1359.7  | 403.23  |
| L       | 1472.78 | 288.2   |
| R       | 1628.88 | 175.12  |

**Competitor Protein: DVU1672\_DGEYLAR**

m/z 1127.598 iTRAQ8plex@0; confidence 0.99

Primary ID: DVU0894A\_DYGEIAR

2E3\_C10\_C12\_S5\_312\_313\_rerun\_080509\_(3\_23\_7)\_(3\_24\_7)\_(3\_25\_7)\_(3\_26\_7)\_(3\_27\_7)\_(3\_28\_7).group

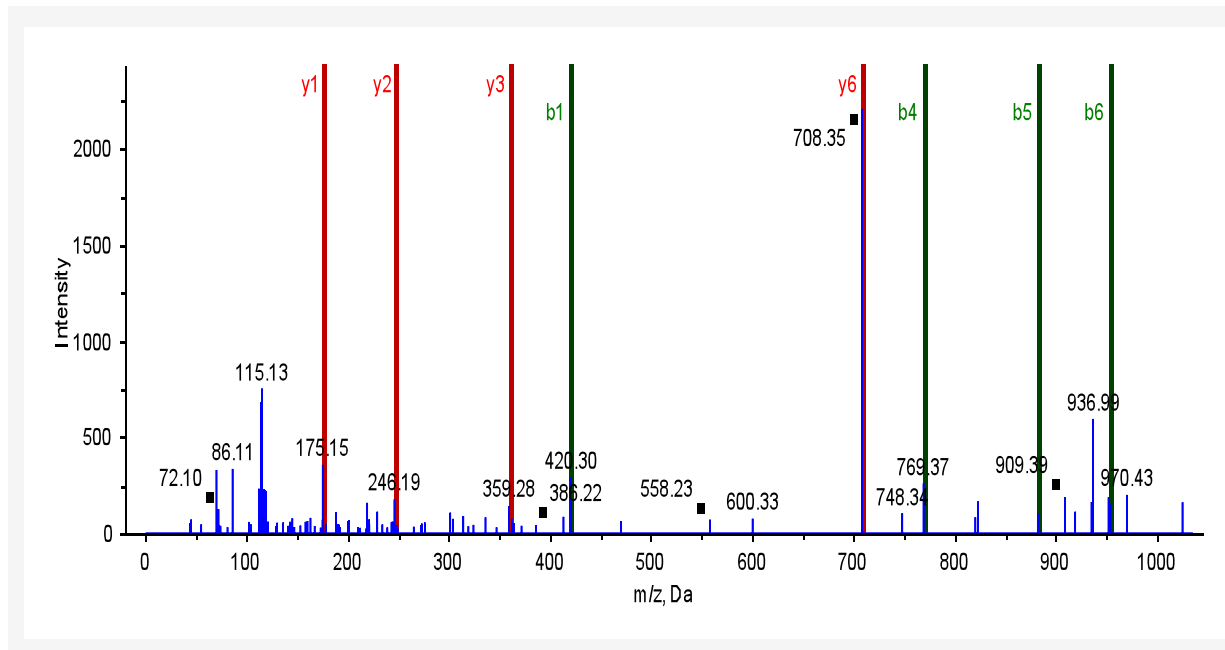

| Residue | b       | y      |
|---------|---------|--------|
| D       | 420.24  | 1127.6 |
| G       | 477.26  | 708.37 |
| E       | 606.3   | 651.35 |
| Y       | 769.37  | 522.3  |
| L       | 882.45  | 359.24 |
| A       | 953.49  | 246.16 |
| R       | 1109.59 | 175.12 |

### Competitor Protein: DVU1758\_VTIAGK

m/z 1196.771 iTRAQ8plex@6;iTRAQ8plex@0; confidence 0.99

Primary ID: DVU1623\_VTIQK

MonoQ\_2A3\_S5\_142\_2D\_SEC\_B11-C2\_120409\_(2\_3\_6).group

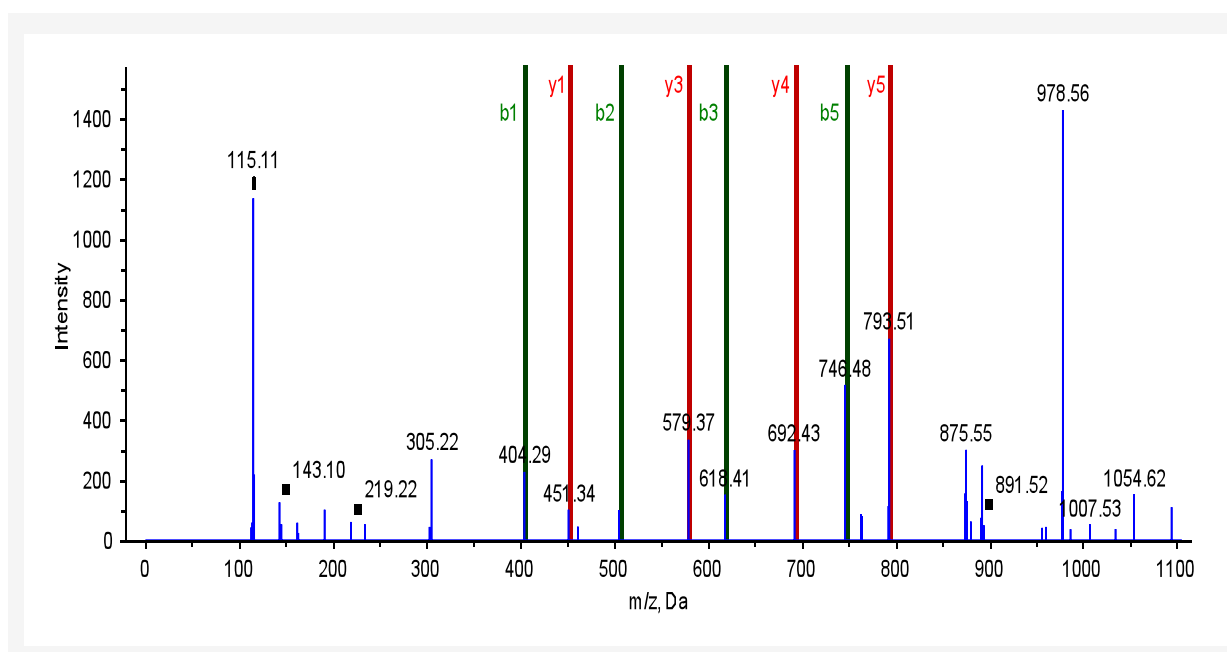

| Residue | b       | y       |
|---------|---------|---------|
| V       | 404.28  | 1196.78 |
| T       | 505.33  | 793.51  |
| I       | 618.41  | 692.46  |
| A       | 689.45  | 579.38  |
| G       | 746.47  | 508.34  |
| K[IT8]  | 1178.77 | 451.32  |

Multiple IDs (confidence 0.99)

DVU0636\_IAALLR m/z 960.6447 iTRAQ8plex@0; cleaved H-I@N-term  
 DVU0651\_LAALLR m/z 960.6447 iTRAQ8plex@0; cleaved G-L@N-term  
 DVU0896\_LAAILR m/z 960.6447iTRAQ8plex@0; cleaved S-L@N-term DVU1772\_LAALLR  
 m/z 960.6447 iTRAQ8plex@0; cleaved S-L@N-term  
 S5\_143\_2D\_tagless\_SEC\_B13-C6\_122109\_(2\_3\_6).group

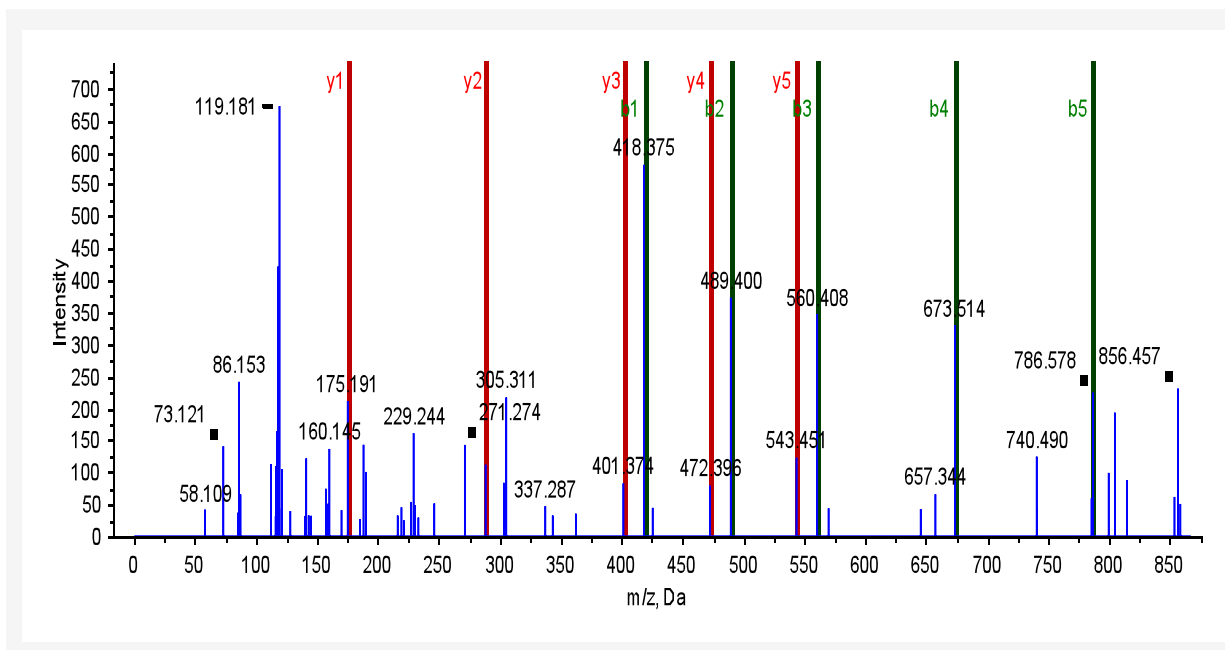

| Residue | b      | y      |
|---------|--------|--------|
| L/I     | 418.30 | 960.65 |
| A       | 489.33 | 543.36 |
| A       | 560.37 | 472.32 |
| L/I     | 673.46 | 401.29 |
| L/I     | 786.54 | 288.20 |
| R       | 942.64 | 175.12 |



**Multiple IDs for LLFLR:**

m/z 965.642      iTRAQ8plex@0;      semitryptic confidence 0.99  
**DVU1884, DVU2570, DVU2684, DVU3236**  
S5\_405-407\_04232010\_(2\_3\_9).group

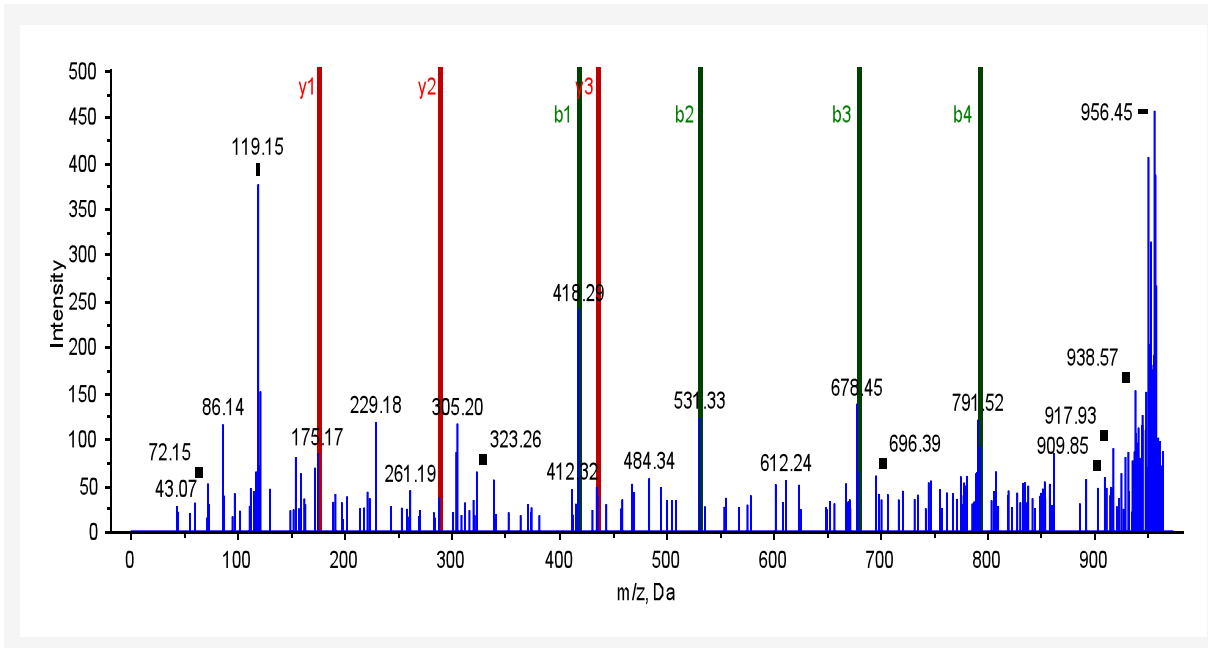

| Residue | b      | y      |
|---------|--------|--------|
| L       | 418.30 | 965.64 |
| L       | 531.38 | 548.36 |
| F       | 678.45 | 435.27 |
| L       | 791.53 | 288.20 |
| R       | 947.63 | 175.12 |

**Competitor Protein: DVU1962\_MVASATVLADSAR**  
 m/z 1611.995 Oxidation@1;iTRAQ8plex@0; confidence 0.99  
 Primary ID: P01267\_FVAPESLK  
 2D4\_C5\_S5\_291\_relabeled\_092509\_(2\_3\_12).group

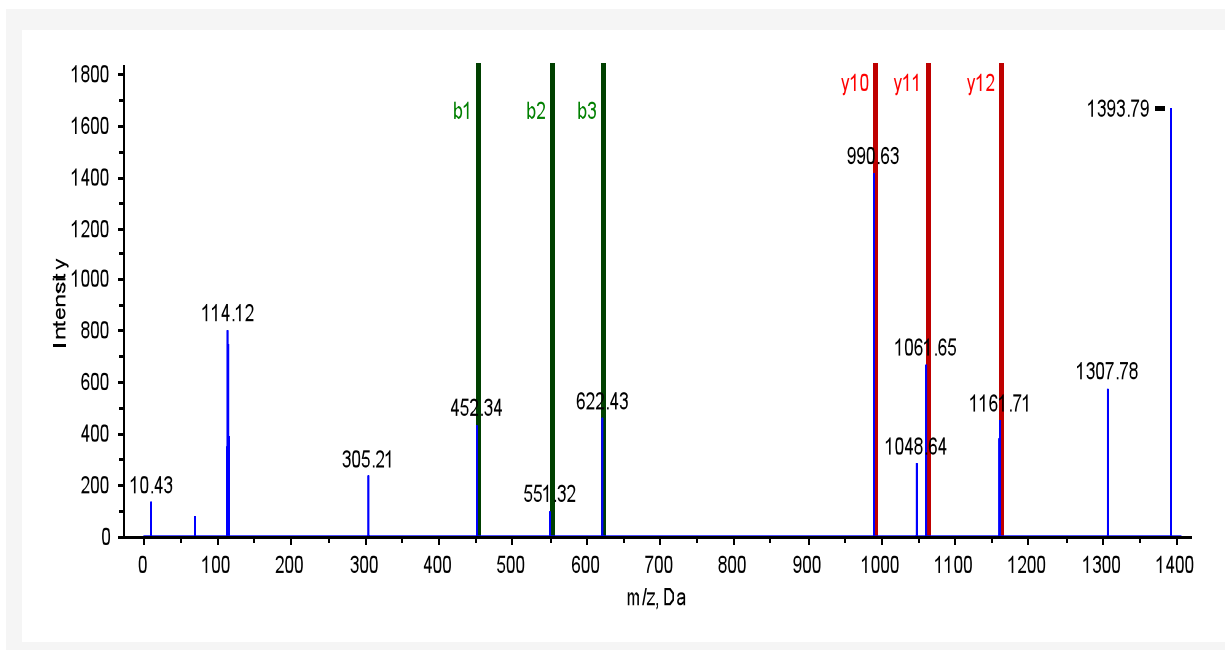

| Residue | b       | y       |
|---------|---------|---------|
| M[Oxi]  | 452.25  | 1611.87 |
| V       | 551.32  | 1160.63 |
| A       | 622.35  | 1061.56 |
| S       | 709.39  | 990.52  |
| A       | 780.42  | 903.49  |
| T       | 881.47  | 832.45  |
| V       | 980.54  | 731.40  |
| L       | 1093.62 | 632.34  |
| A       | 1164.66 | 519.25  |
| D       | 1279.69 | 448.22  |
| S       | 1366.72 | 333.19  |
| A       | 1437.76 | 246.16  |
| R       | 1593.86 | 175.12  |

**Competitor Protein: DVU1987\_KGDGALTR**

m/z 1538.911 iTRAQ8plex@1;iTRAQ8plex@0; missed K-G@1 confidence 0.9657  
DVU1336\_KGDGPSITR  
2A3\_C4\_C6\_S5\_219\_220\_02-20-2009\_(2\_3\_6).group

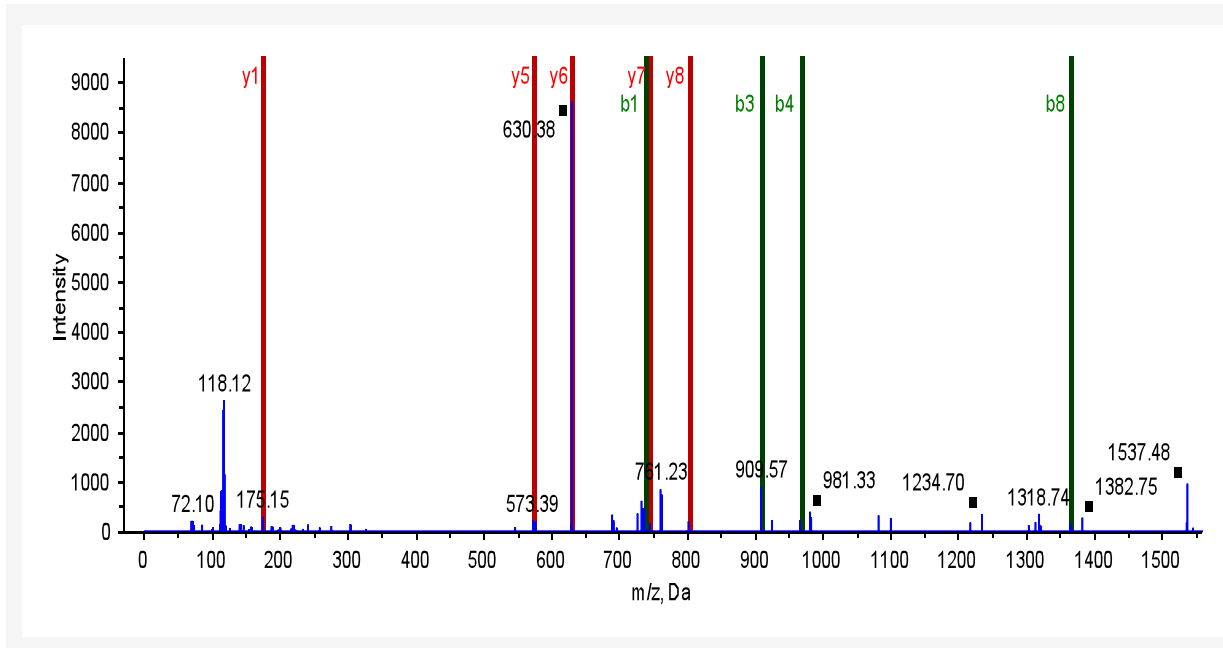

| Residue | b       | y       |
|---------|---------|---------|
| K[IT8]  | 737.51  | 1538.95 |
| G       | 794.53  | 802.44  |
| D       | 909.56  | 745.42  |
| G       | 966.58  | 630.39  |
| A       | 1037.62 | 573.37  |
| L       | 1150.70 | 502.33  |
| T       | 1251.75 | 389.25  |
| L       | 1364.84 | 288.20  |
| R       | 1520.94 | 175.12  |

### Competitor Protein: DVU2101\_ITGGLR

m/z 1049.645 iTRAQ8plex@0; confidence 0.99

Primary ID: DVU0398\_ITGWIR

2E3\_D5\_D7\_S5\_316\_317\_072409\_(2\_3\_4).group

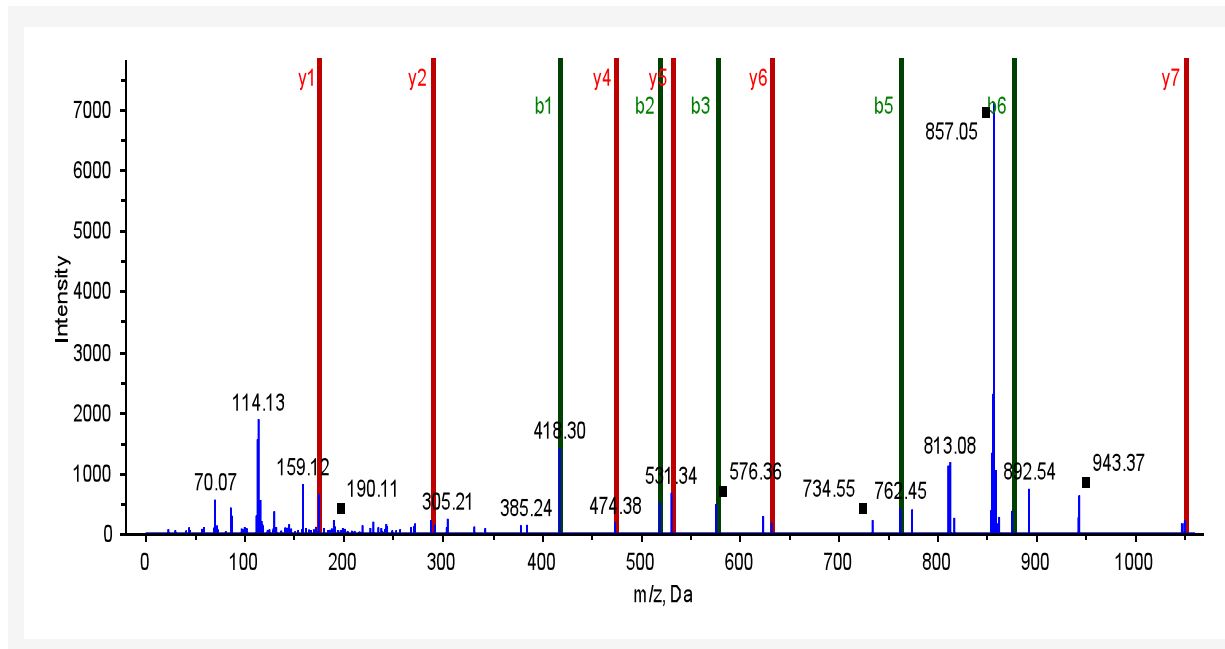

| Residue | b       | y       |
|---------|---------|---------|
| I       | 418.30  | 1049.63 |
| T       | 519.34  | 632.34  |
| G       | 576.37  | 531.29  |
| E       | 705.41  | 474.27  |
| G       | 762.43  | 345.22  |
| L       | 875.51  | 288.20  |
| R       | 1031.62 | 175.12  |

### Multiple Competitor Proteins:

DVU2148\_LAASTYSR

DVU2932\_ALAEATHR

DVUA0047\_ALATEAHR

m/z 1172.729 iTRAQ8plex@0; confidence 0.99

2A6\_B14\_C2\_S5\_232\_233\_rerun\_04-01-09\_(2\_3\_2)\_(2\_3\_3).group

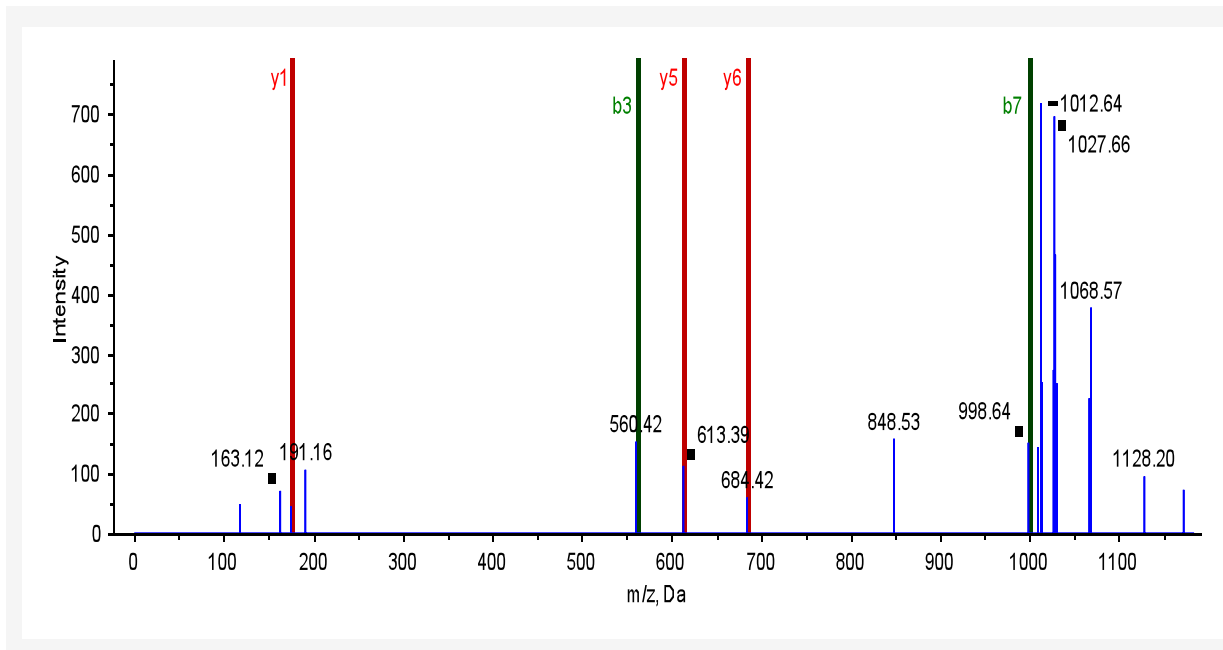

|                 | Residue | b       | y       |
|-----------------|---------|---------|---------|
|                 | L       | 418.30  | 1172.66 |
|                 | A       | 489.33  | 755.37  |
|                 | A       | 560.37  | 684.33  |
| <b>DVU2148</b>  | S       | 647.40  | 613.29  |
|                 | T       | 748.45  | 526.26  |
|                 | Y       | 911.51  | 425.21  |
|                 | S       | 998.55  | 262.15  |
|                 | R       | 1154.65 | 175.12  |
|                 | Residue | b       | y       |
|                 | A       | 376.25  | 1172.73 |
|                 | L       | 489.33  | 797.49  |
|                 | A       | 560.37  | 684.40  |
| <b>DVUA0047</b> | P       | 657.42  | 613.37  |
|                 | I       | 770.51  | 516.31  |
|                 | V       | 869.58  | 403.23  |
|                 | E       | 998.62  | 304.16  |
|                 | R       | 1154.72 | 175.12  |
|                 | Residue | b       | y       |
|                 | A       | 376.25  | 1172.67 |
|                 | L       | 489.33  | 797.43  |
|                 | A       | 560.37  | 684.34  |
|                 | T       | 661.42  | 613.31  |
| <b>DVU2932</b>  | E       | 790.46  | 512.26  |
|                 | A       | 861.50  | 383.22  |
|                 | H       | 998.56  | 312.18  |
|                 | R       | 1154.66 | 175.12  |

### DVU2172\_KQLQYYEGELER

m/z 2164.097 iTRAQ8plex@1;iTRAQ8plex@0; missed K-Q@1 confidence 0.99  
 S5\_461\_#2-3\_462\_463\_102810\_(2\_3\_3)\_(2\_3\_9).group

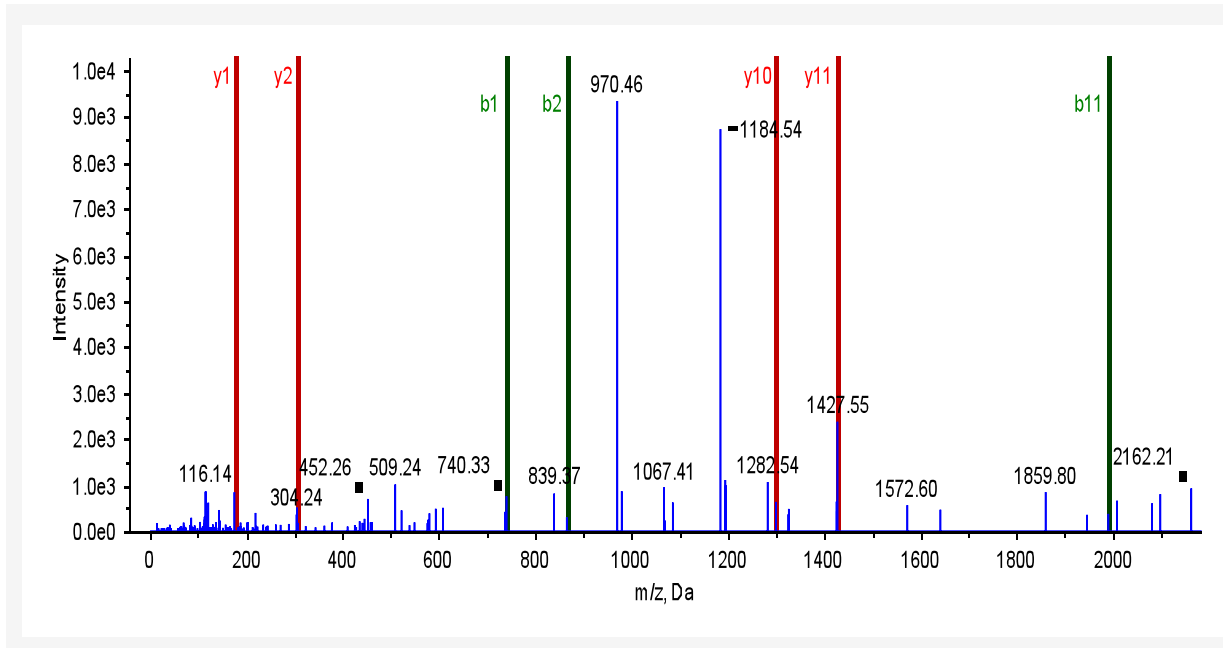

| Residue | b       | y       |
|---------|---------|---------|
| K[IT8]  | 737.51  | 2164.19 |
| Q       | 865.57  | 1427.68 |
| L       | 978.66  | 1299.62 |
| Q       | 1106.71 | 1186.54 |
| Y       | 1269.78 | 1058.48 |
| Y       | 1432.84 | 895.42  |
| E       | 1561.88 | 732.35  |
| G       | 1618.90 | 603.31  |
| E       | 1747.95 | 546.29  |
| L       | 1861.03 | 417.25  |
| E       | 1990.07 | 304.16  |
| R       | 2146.18 | 175.12  |

### Competitor Protein: DVU2309\_ASGVISQSTDLASR

m/z 1695.943 iTRAQ8plex@0; confidence 0.99

Primary ID: DORF22580\_CARWAWMPASR

S5\_387\_388\_389\_multiplexes\_1-3\_03092010\_(2\_3\_3).group

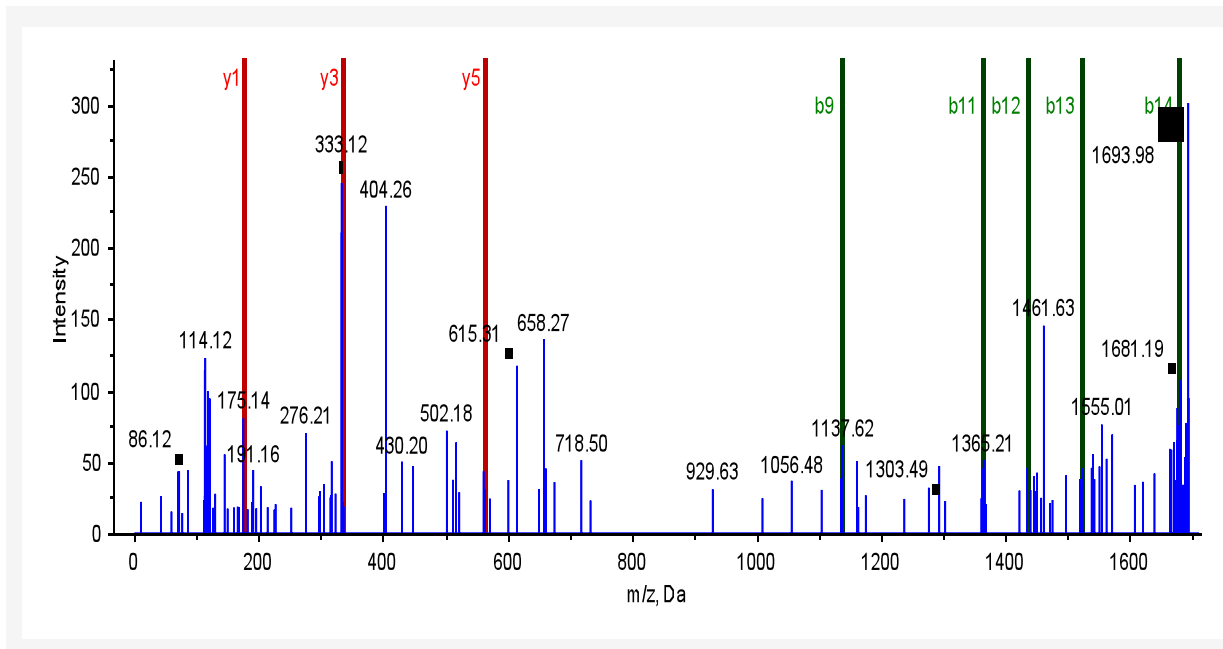

| Residue | b       | y       |
|---------|---------|---------|
| A       | 376.25  | 1695.92 |
| S       | 463.28  | 1320.68 |
| G       | 520.30  | 1233.64 |
| V       | 619.37  | 1176.62 |
| I       | 732.46  | 1077.55 |
| S       | 819.49  | 964.47  |
| Q       | 947.55  | 877.44  |
| S       | 1034.58 | 749.38  |
| T       | 1135.63 | 662.35  |
| D       | 1250.65 | 561.30  |
| L       | 1363.74 | 446.27  |
| A       | 1434.77 | 333.19  |
| S       | 1521.81 | 262.15  |
| R       | 1677.91 | 175.12  |

### Competitor Protein DVU2337\_IALLESK

m/z 1381.816 iTRAQ8plex@7;iTRAQ8plex@0; confidence 0.99

Primary ID: DVU3025\_IAPEESK

2D1\_D5\_D7\_S5\_283\_284\_plate\_A\_05-15-09\_(2\_3\_4).group

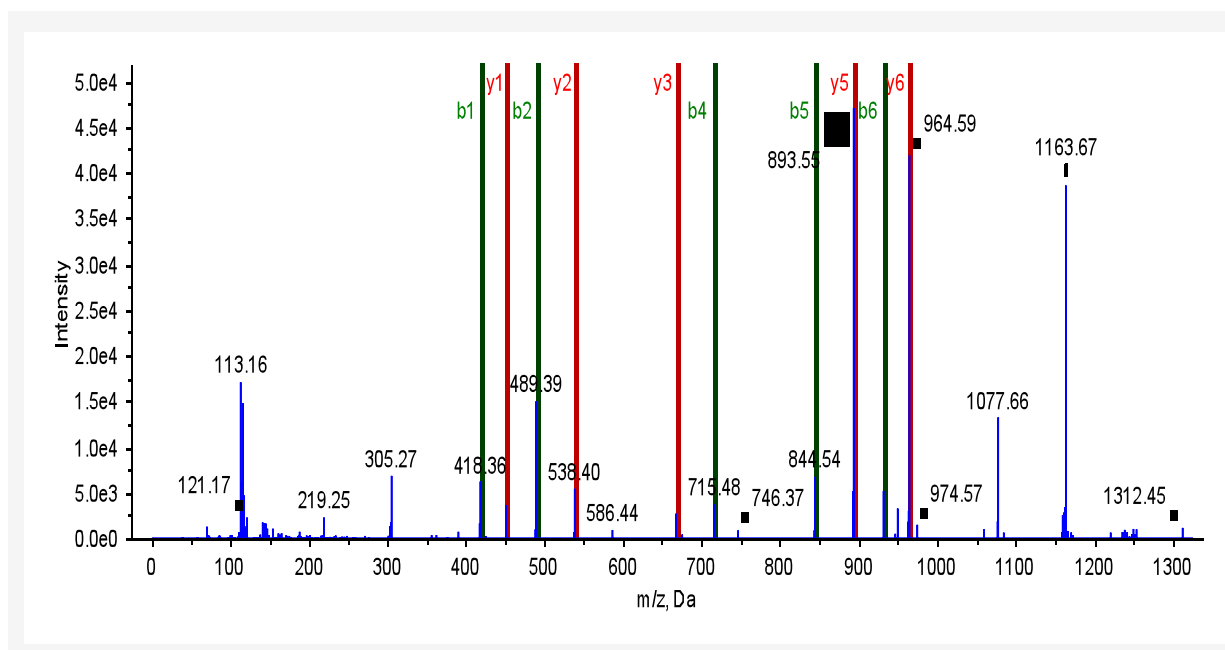

| Residue | b       | y       |
|---------|---------|---------|
| I       | 418.30  | 1381.89 |
| A       | 489.33  | 964.60  |
| L       | 602.42  | 893.56  |
| L       | 715.50  | 780.48  |
| E       | 844.54  | 667.39  |
| S       | 931.58  | 538.35  |
| K[IT8]  | 1363.88 | 451.32  |



### DVU2460\_ALIRIER

m/z 1174.667 iTRAQ8plex@0; missed R-I@4 confidence 0.9646  
2D1\_C15\_D2\_S5\_280\_282\_05-29-09\_(2\_3\_4).group

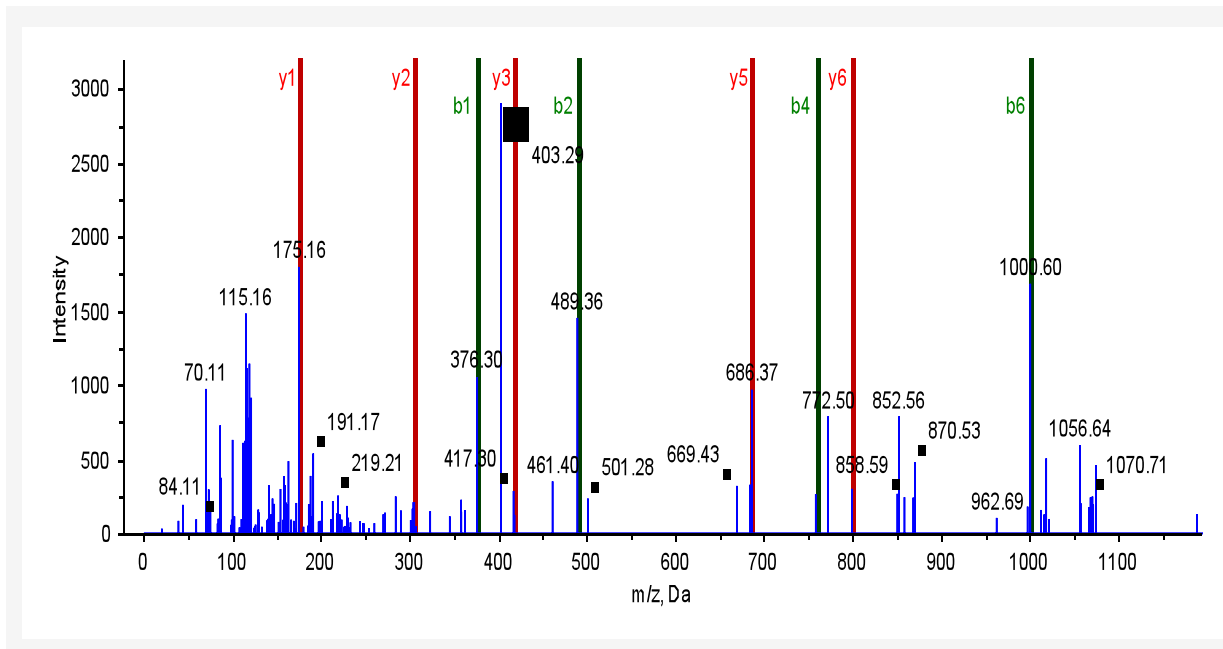

| Residue | b       | y       |
|---------|---------|---------|
| A       | 376.25  | 1174.76 |
| L       | 489.33  | 799.51  |
| I       | 602.42  | 686.43  |
| R       | 758.52  | 573.35  |
| I       | 871.60  | 417.25  |
| E       | 1000.65 | 304.16  |
| R       | 1156.75 | 175.12  |

### DVU2535\_KLWILR

m/z 1436.95

iTRAQ8plex@1;iTRAQ8plex@0;

missed K-L@1 confidence 0.9759

2D4\_SEC\_B7-B15\_05072010\_(2\_3\_2).group

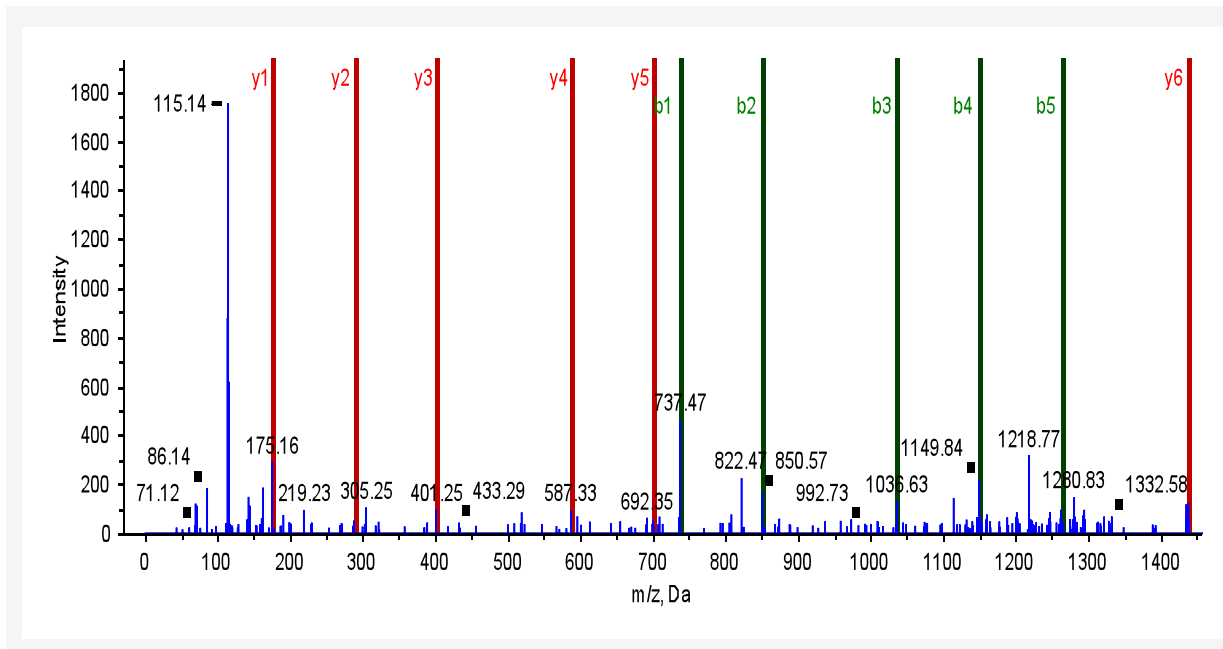

| Residue | b       | y       |
|---------|---------|---------|
| K[IT8]  | 737.51  | 1436.96 |
| L       | 850.60  | 700.45  |
| W       | 1036.68 | 587.37  |
| I       | 1149.76 | 401.29  |
| L       | 1262.84 | 288.20  |
| R       | 1418.95 | 175.12  |

### DVU2564\_AAWAE

m/z 851.4802 iTRAQ8plex@0; cleaved E-A@N-term; cleaved E-H@C-term

confidence 0.9563

1C7\_SEC\_B5-B9\_07Jan2010\_(2\_3\_6)\_(2\_3\_9).group

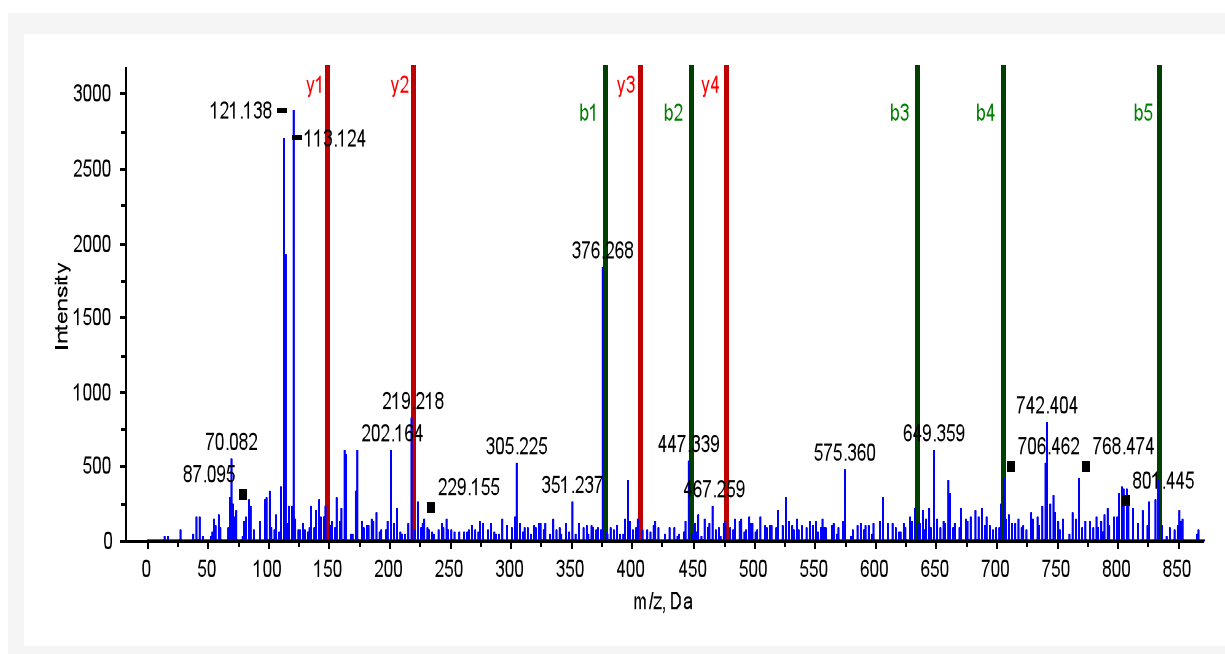

| Residue | b      | y      |
|---------|--------|--------|
| A       | 376.25 | 851.46 |
| A       | 447.29 | 476.21 |
| W       | 633.37 | 405.18 |
| A       | 704.40 | 219.10 |
| E       | 833.45 | 148.06 |

### Competitor Protein: DVU2604\_RLYAALAR

m/z 1237.814 iTRAQ8plex@0; missed R-L@1 confidence 0.99

Primary ID: DVU2543\_KALAAR

S5\_396-398\_03-30-2010\_(2\_3\_6).group

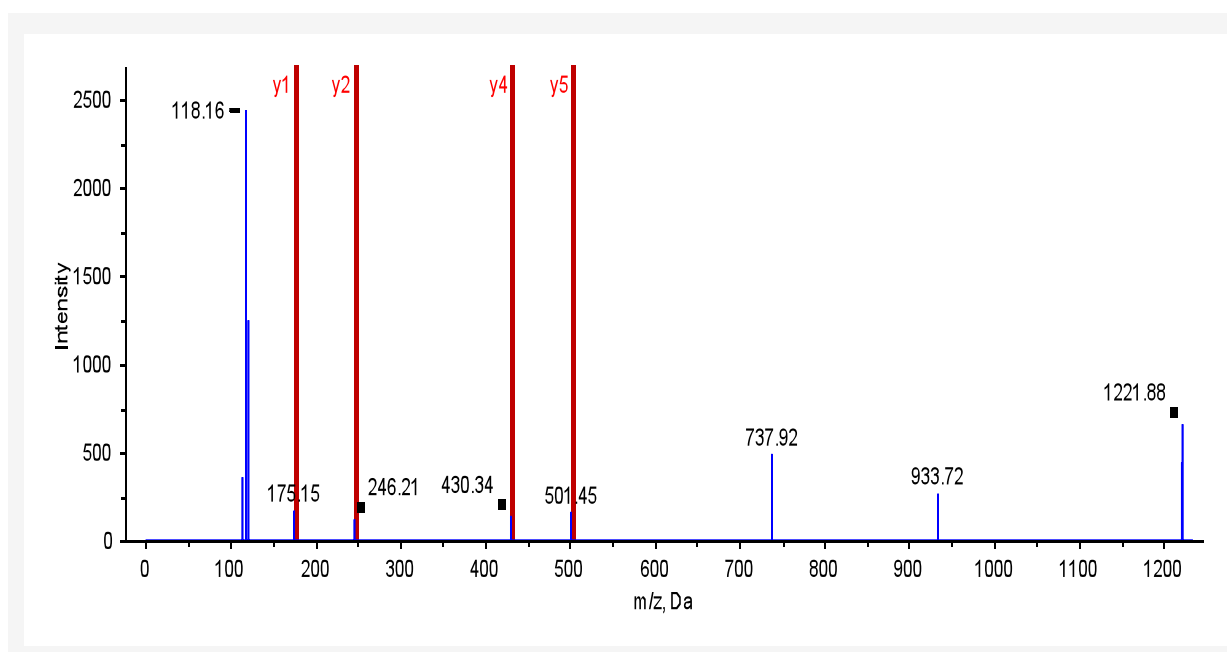

| Residue | b       | y       |
|---------|---------|---------|
| R       | 461.31  | 1237.77 |
| L       | 574.40  | 777.46  |
| Y       | 737.46  | 664.38  |
| A       | 808.50  | 501.31  |
| A       | 879.54  | 430.28  |
| L       | 992.62  | 359.24  |
| A       | 1063.66 | 246.16  |
| R       | 1219.76 | 175.12  |

### Competitor Protein: DVU2637\_TLELTR

m/z 876.5247 iTRAQ4plex@0; confidence 0.99

Primary ID: DVU0606\_MLELAR

D2\_Aldolase\_1st\_Exp\_10-23-07\_(2\_3\_7)\_(11\_12\_8).group

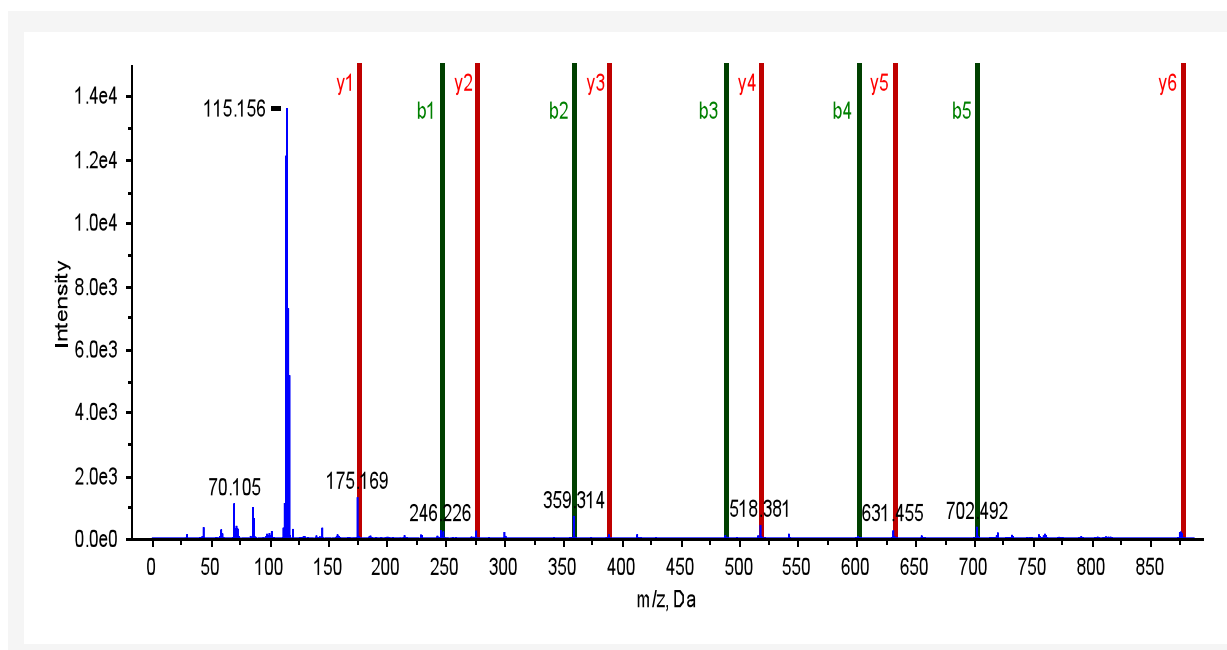

| Residue | b        | y        |
|---------|----------|----------|
| T       | 246.157  | 876.5271 |
| L       | 359.2411 | 631.3774 |
| E       | 488.2837 | 518.2933 |
| L       | 601.3677 | 389.2507 |
| T       | 702.4154 | 276.1666 |
| R       | 858.5165 | 175.119  |

### DVU2647\_YFATPFPAR

m/z 1373.74 iTRAQ8plex@0; cleaved Q-Y@N-term confidence 0.99  
S5\_390\_391\_multiplexes\_1-3\_03122010\_(2\_3\_6).group

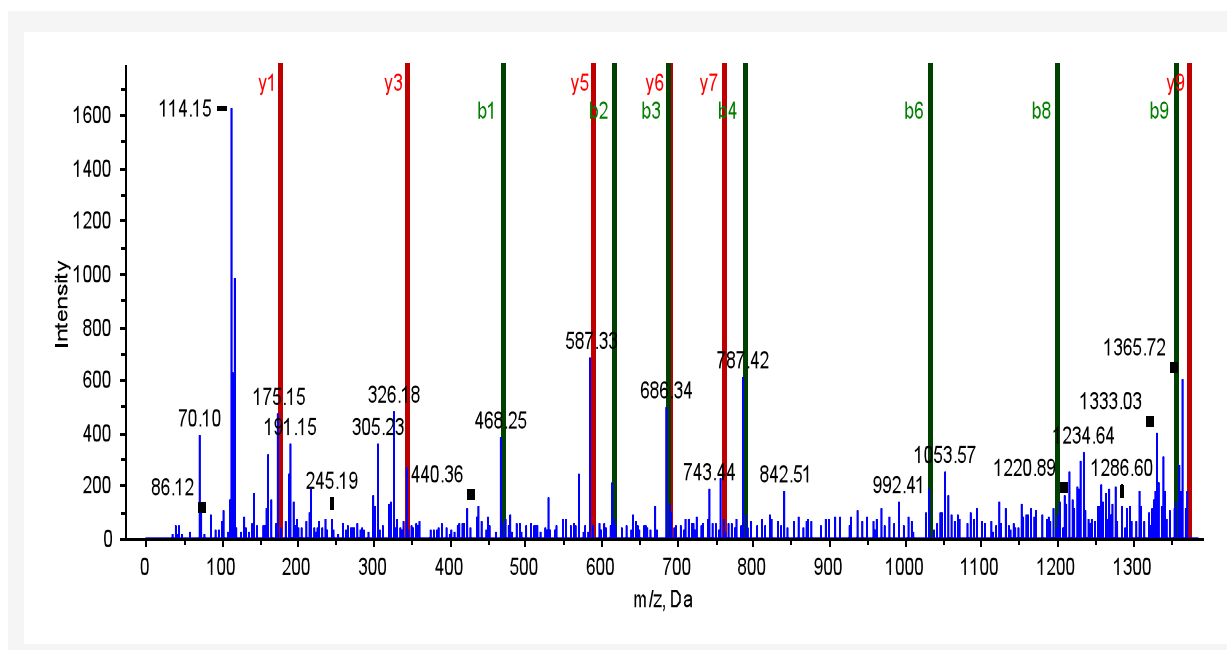

| Residue | b       | y       |
|---------|---------|---------|
| Y       | 468.28  | 1373.75 |
| F       | 615.34  | 906.48  |
| A       | 686.38  | 759.41  |
| T       | 787.43  | 688.38  |
| P       | 884.48  | 587.33  |
| F       | 1031.55 | 490.28  |
| P       | 1128.60 | 343.21  |
| A       | 1199.64 | 246.16  |
| R       | 1355.74 | 175.12  |

### Competitor Protein: DVU2724\_QAFRAR

m/z 893.4175

Deamidated@1;iTRAQ4plex@0; missed R-A@4

confidence 0.99

Primary ID: DVU1044A\_EAPNYR

C14\_PVDF\_iTRAQ\_Aldolase\_3rd\_10-10-07\_(7\_8\_3).group

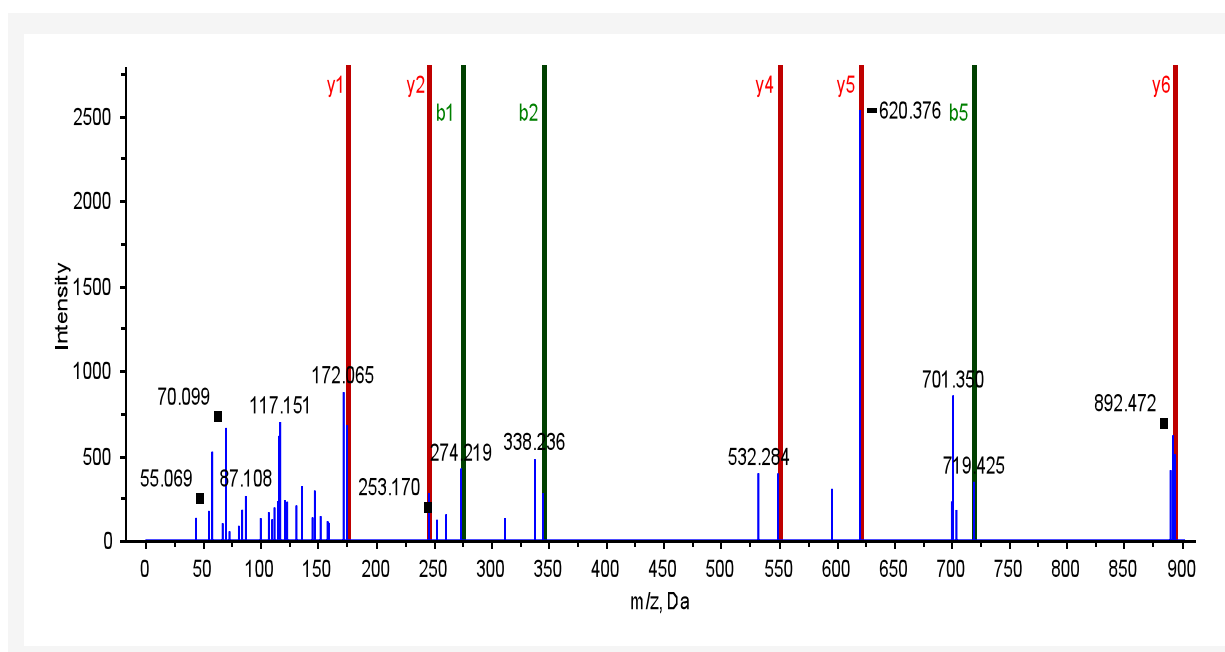

| Residue | b      | y      |
|---------|--------|--------|
| Q[Dea]  | 274.15 | 893.51 |
| A       | 345.19 | 620.36 |
| F       | 492.26 | 549.33 |
| R       | 648.36 | 402.26 |
| A       | 719.40 | 246.16 |
| R       | 875.50 | 175.12 |

### Competitor Protein: DVU2741\_NLPYGMQR

m/z 1283.762 Deamidated@1;iTRAQ8plex@0; confidence 0.99

Primary ID: DVU0631\_DLPPATPIR

S5\_401-403\_rerun\_06082010\_(2\_3\_5).group

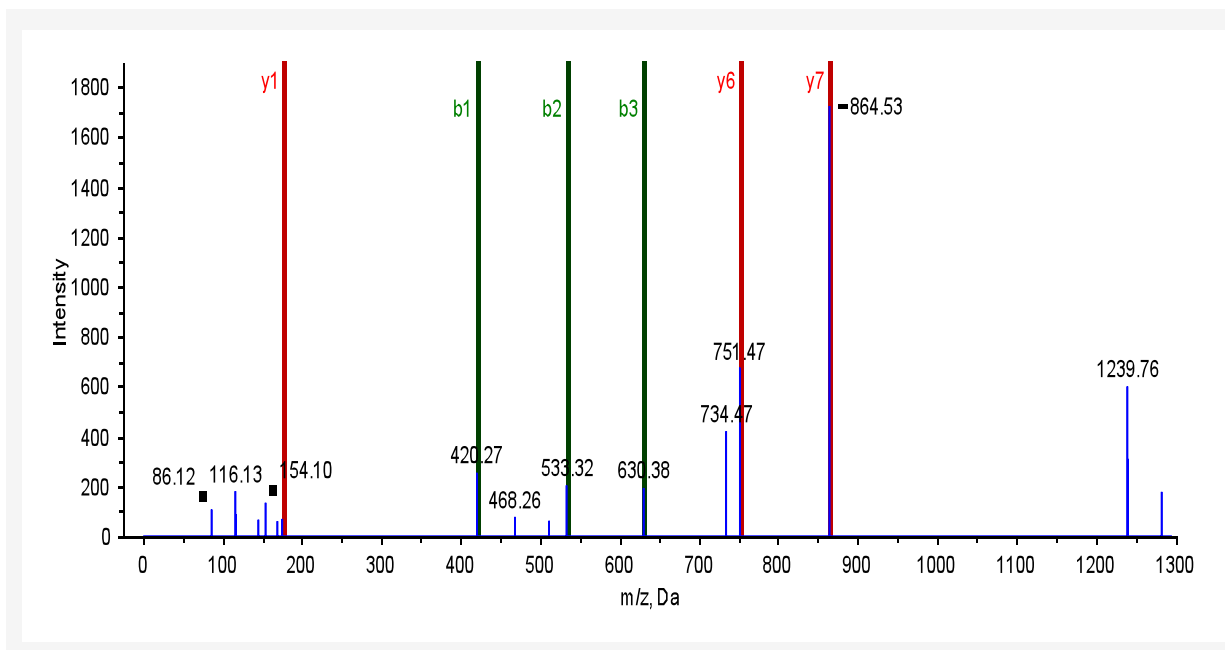

| Residue | b       | y       |
|---------|---------|---------|
| N[Dea]  | 420.24  | 1283.67 |
| L       | 533.32  | 864.44  |
| P       | 630.38  | 751.36  |
| Y       | 793.44  | 654.30  |
| G       | 850.46  | 491.24  |
| M       | 981.50  | 434.22  |
| Q       | 1109.56 | 303.18  |
| R       | 1265.66 | 175.12  |



### DVU2879\_AGKRVADAHAALLR

m/z 2048.027

iTRAQ8plex@3;iTRAQ8plex@0;

cleaved Q-A@N-term; missed K-

F@3 confidence 0.99

AS2\_601-603\_03022012\_(2\_3\_2).group

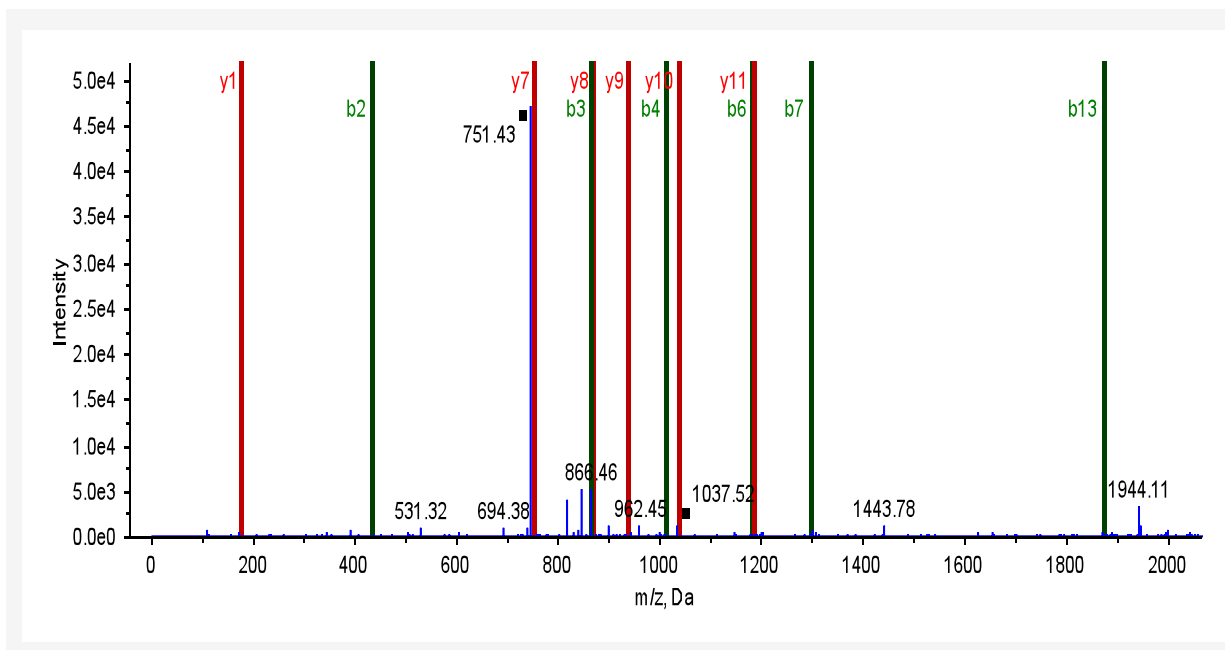

| Residue | b       | y       |
|---------|---------|---------|
| A       | 376.25  | 2048.22 |
| G       | 433.27  | 1672.98 |
| K[IT8]  | 865.57  | 1615.96 |
| F       | 1012.64 | 1183.66 |
| V       | 1111.71 | 1036.59 |
| A       | 1182.75 | 937.52  |
| D       | 1297.77 | 866.48  |
| A       | 1368.81 | 751.46  |
| H       | 1505.87 | 680.42  |
| A       | 1576.91 | 543.36  |
| A       | 1647.94 | 472.32  |
| L       | 1761.03 | 401.29  |
| L       | 1874.11 | 288.2   |
| R       | 2030.21 | 175.12  |

### Competitor Protein: DVU2967\_IEELLR

m/z 1076.658 iTRAQ8plex@0; cleaved D-I@N-term confidence 0.99

Primary ID: DVU3260A\_PLEELLR

S5\_405-407\_04232010\_(2\_3\_7).group

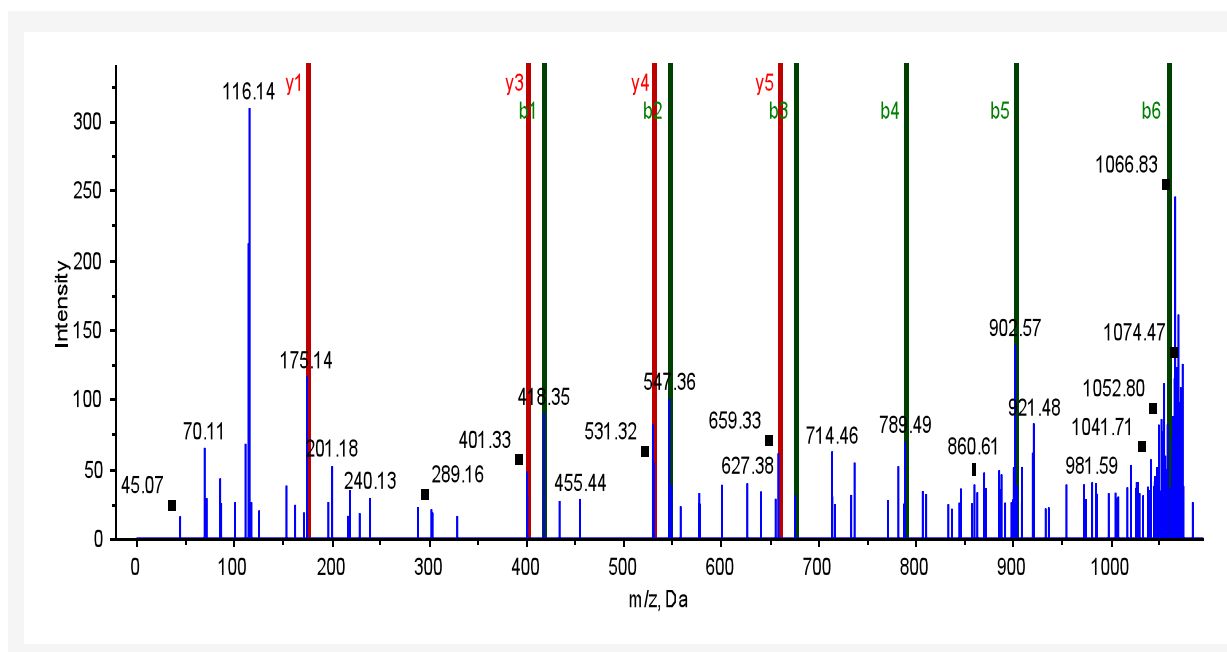

| Residue | b       | y       |
|---------|---------|---------|
| I       | 418.30  | 1076.66 |
| E       | 547.34  | 659.37  |
| E       | 676.38  | 530.33  |
| L       | 789.47  | 401.29  |
| L       | 902.55  | 288.20  |
| R       | 1058.65 | 175.12  |

### DVU2989\_YAWPGNIR

m/z 1120.602 iTRAQ4plex@0; cleaved T-Y@N-term confidence 0.99  
C14\_PVDF\_iTRAQ\_Aldolase\_3rd\_10-10-07\_(15\_16\_6).group

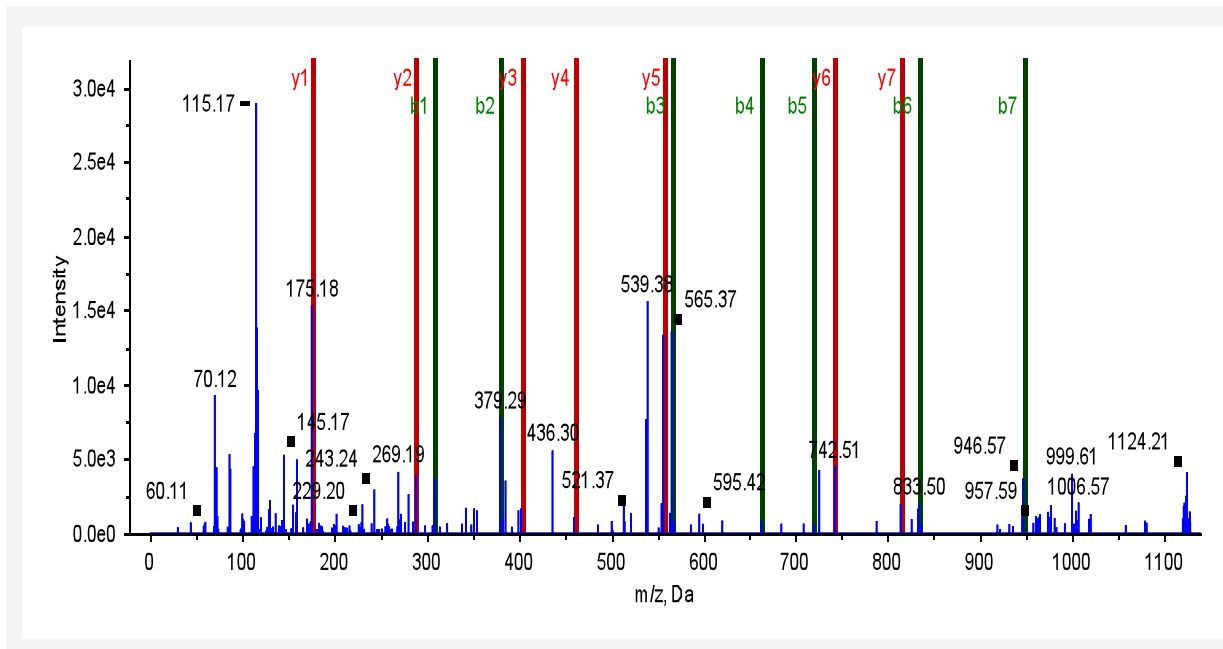

| Residue | b       | y       |
|---------|---------|---------|
| Y       | 308.17  | 1120.60 |
| A       | 379.21  | 813.44  |
| W       | 565.29  | 742.40  |
| P       | 662.34  | 556.32  |
| G       | 719.36  | 459.27  |
| N       | 833.41  | 402.25  |
| I       | 946.49  | 288.20  |
| R       | 1102.59 | 175.12  |

### DVU3022\_IAPQVPVILVSGR

m/z 1652.966 iTRAQ8plex@0; cleaved D-I@N-term confidence 0.99  
 S5\_619-621\_08162012\_(2\_3\_6).group

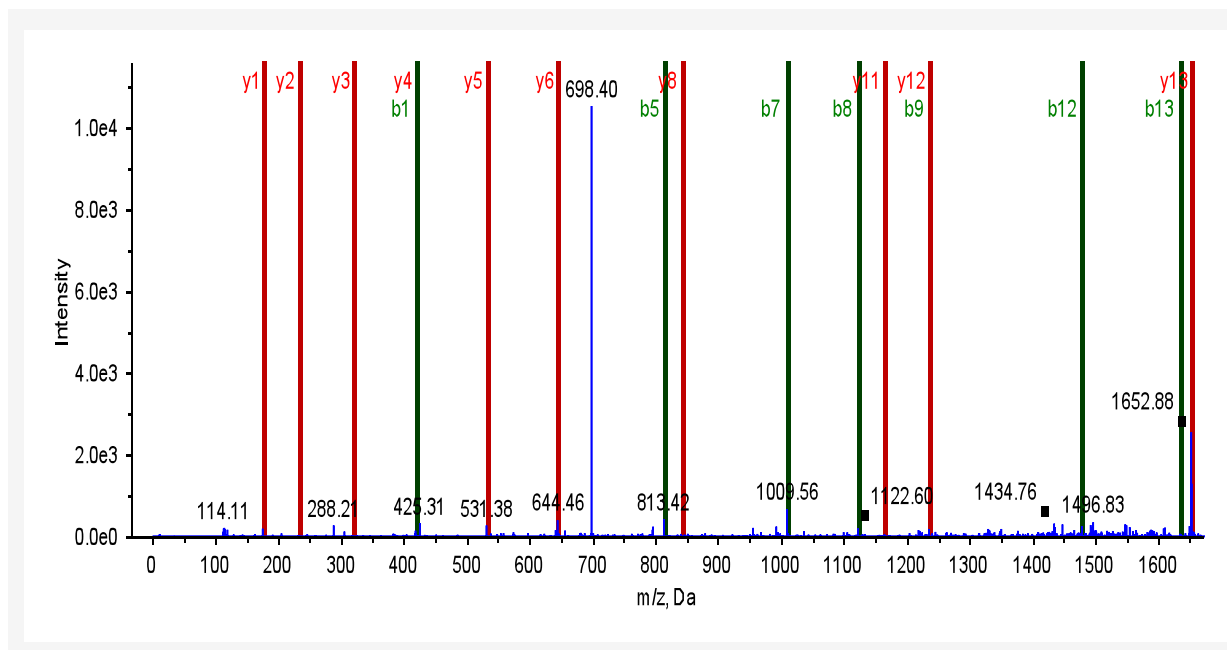

| Residue | b       | y       |
|---------|---------|---------|
| I       | 418.30  | 1653.04 |
| A       | 489.33  | 1235.75 |
| P       | 586.39  | 1164.71 |
| Q       | 714.45  | 1067.66 |
| V       | 813.51  | 939.60  |
| P       | 910.57  | 840.53  |
| V       | 1009.63 | 743.48  |
| I       | 1122.72 | 644.41  |
| L       | 1235.80 | 531.32  |
| V       | 1334.87 | 418.24  |
| S       | 1421.90 | 319.17  |
| G       | 1478.92 | 232.14  |
| R       | 1635.03 | 175.12  |

### DVU3072\_WQWAGLLPR

m/z 1447.115 Oxidation@8;iTRAQ8plex@0; confidence 0.99

S5\_256\_258\_261\_265\_selected\_4plexes\_relabeled\_092509\_(2\_3\_2).group

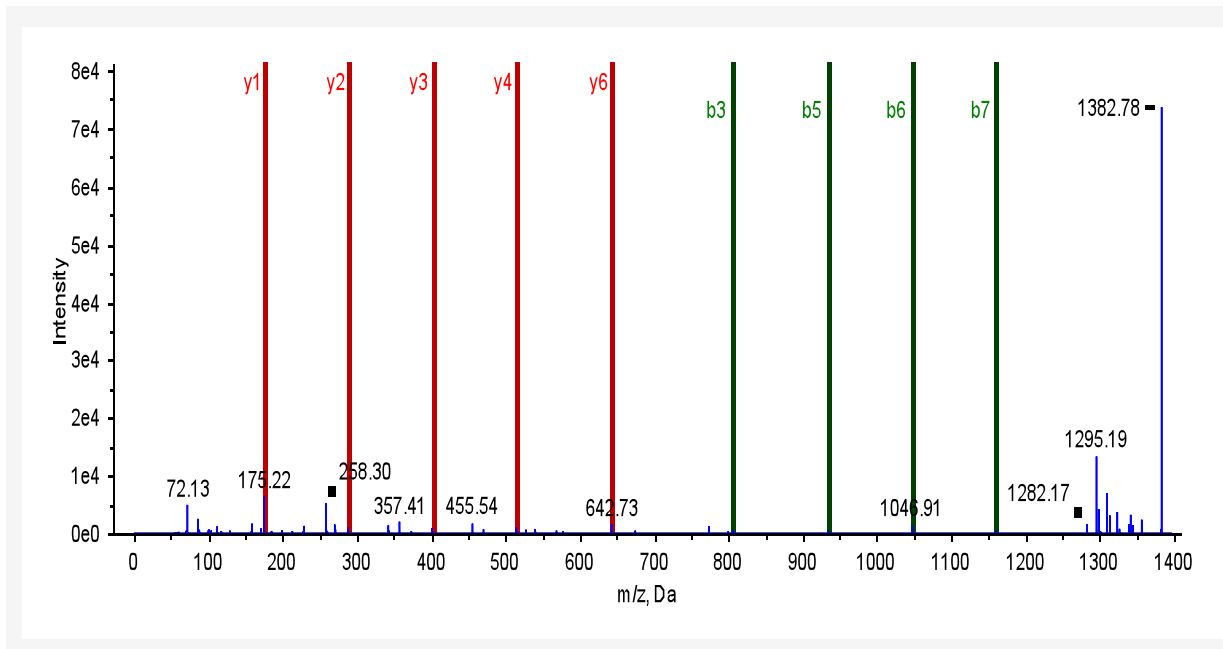

| Residue | b       | y       |
|---------|---------|---------|
| W       | 491.29  | 1446.82 |
| Q       | 619.35  | 956.53  |
| W       | 805.43  | 828.47  |
| A       | 876.47  | 642.39  |
| G       | 933.49  | 571.36  |
| L       | 1046.57 | 514.33  |
| L       | 1159.66 | 401.25  |
| P[Oxi]  | 1272.70 | 288.17  |
| R       | 1428.81 | 175.12  |

### Competitor Protein: DVU3127\_IEPER

m/z 947.6161 iTRAQ8plex@0; cleaved S-I@N-term confidence 0.99

Primary ID: DVU1833\_LEILR

S5\_376-378\_8plex\_1-3\_correct\_02-11-10\_(2\_3\_9).group

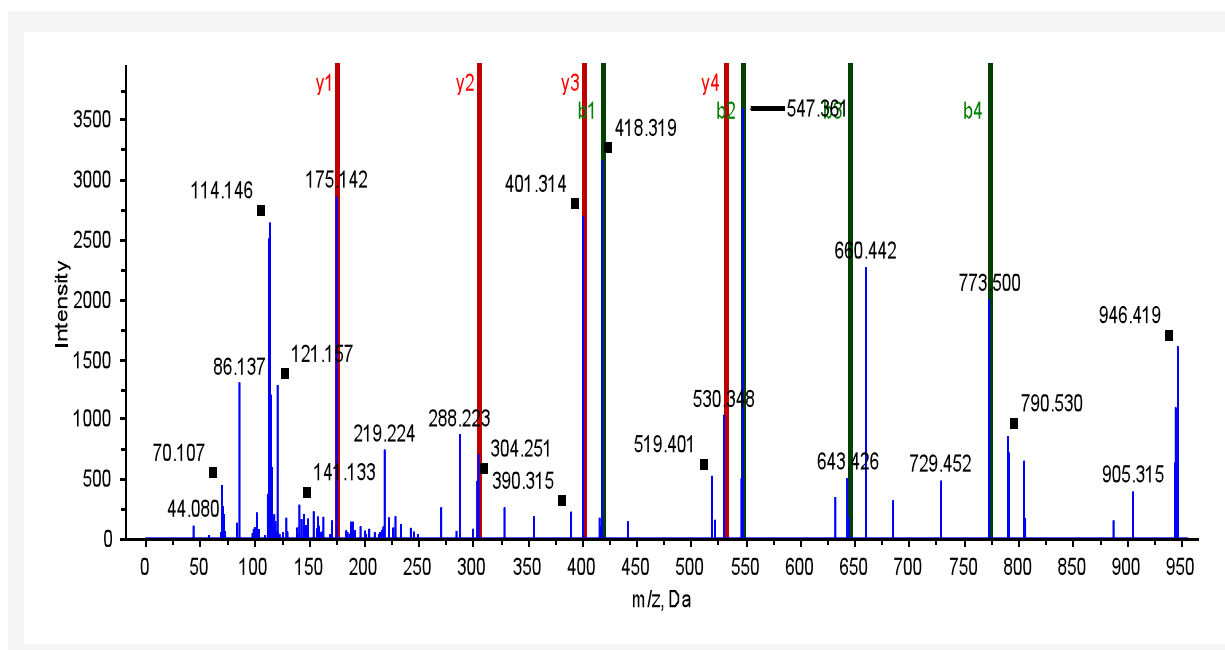

| Residue | b      | y      |
|---------|--------|--------|
| I       | 418.30 | 947.55 |
| E       | 547.34 | 530.26 |
| P       | 644.39 | 401.21 |
| E       | 773.43 | 304.16 |
| R       | 929.54 | 175.12 |

### DVU3180\_LSFQK

m/z 1230.773 iTRAQ8plex@5;iTRAQ8plex@0; cleaved S-L@N-term confidence 0.99  
2B6\_C2\_C5\_S5\_256\_258\_04-28-09\_(2\_3\_6).group

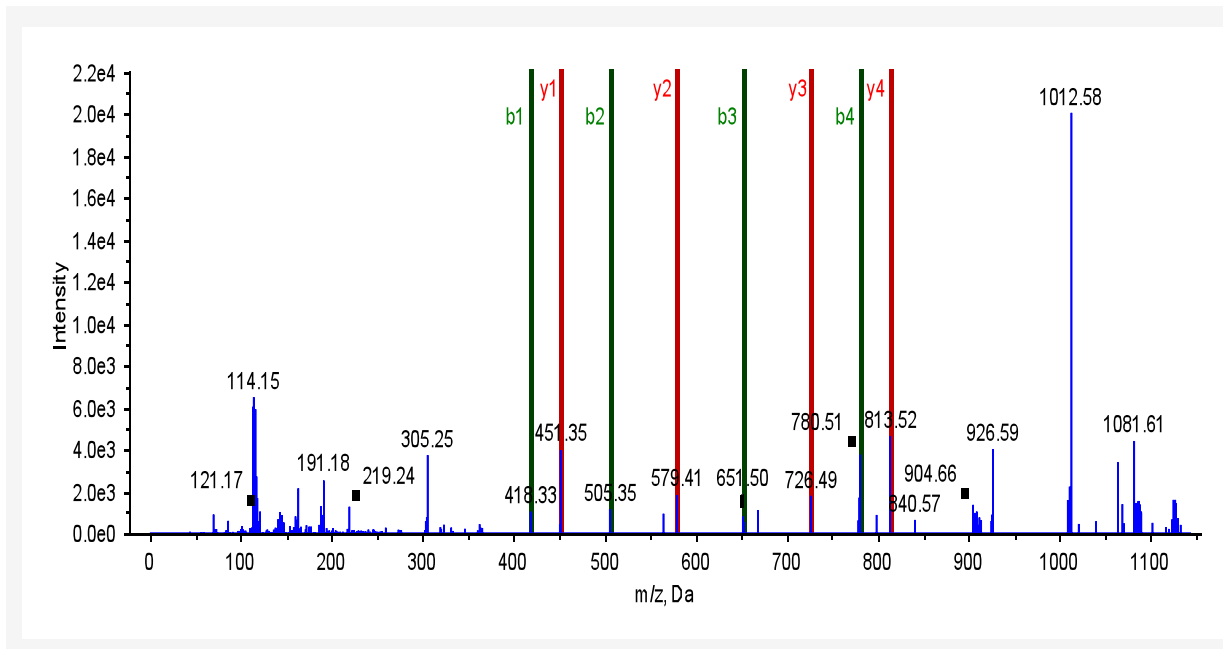

| Residue | b       | y       |
|---------|---------|---------|
| L       | 418.30  | 1230.77 |
| S       | 505.33  | 813.48  |
| F       | 652.40  | 726.45  |
| Q       | 780.46  | 579.38  |
| K[IT8]  | 1212.76 | 451.32  |

### Competitor Protein: DVU3253\_EVLDESER

m/z 1280.678 iTRAQ8plex@0; confidence 0.99

Primary ID: DVU3220\_EVLDMVDR

2A6\_C6\_C8\_DvH4-6\_C10\_C12\_DvH2\_5\_6\_rerun\_03-31-09\_(2\_3\_2).group

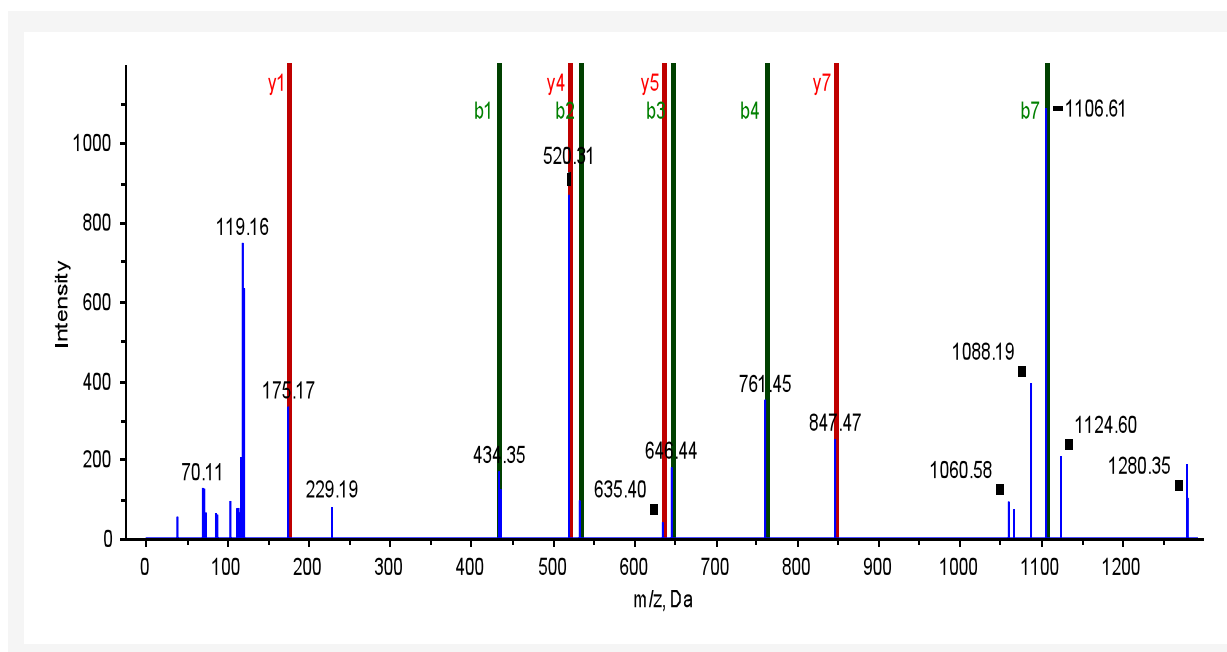

| Residue | b       | y       |
|---------|---------|---------|
| E       | 434.26  | 1280.66 |
| V       | 533.32  | 847.42  |
| L       | 646.41  | 748.35  |
| D       | 761.43  | 635.26  |
| E       | 890.48  | 520.24  |
| S       | 977.51  | 391.19  |
| E       | 1106.55 | 304.16  |
| R       | 1262.65 | 175.12  |



### Competitor Protein: DVU3388\_LELVGGK

m/z 1323.839 iTRAQ8plex@7;iTRAQ8plex@0; confidence 0.9846

Primary ID: DVU1191\_LELVNK

SEC\_B15\_C2\_HIC\_combos\_B13-D7\_090909\_(2\_3\_3)\_(3\_4\_3).group

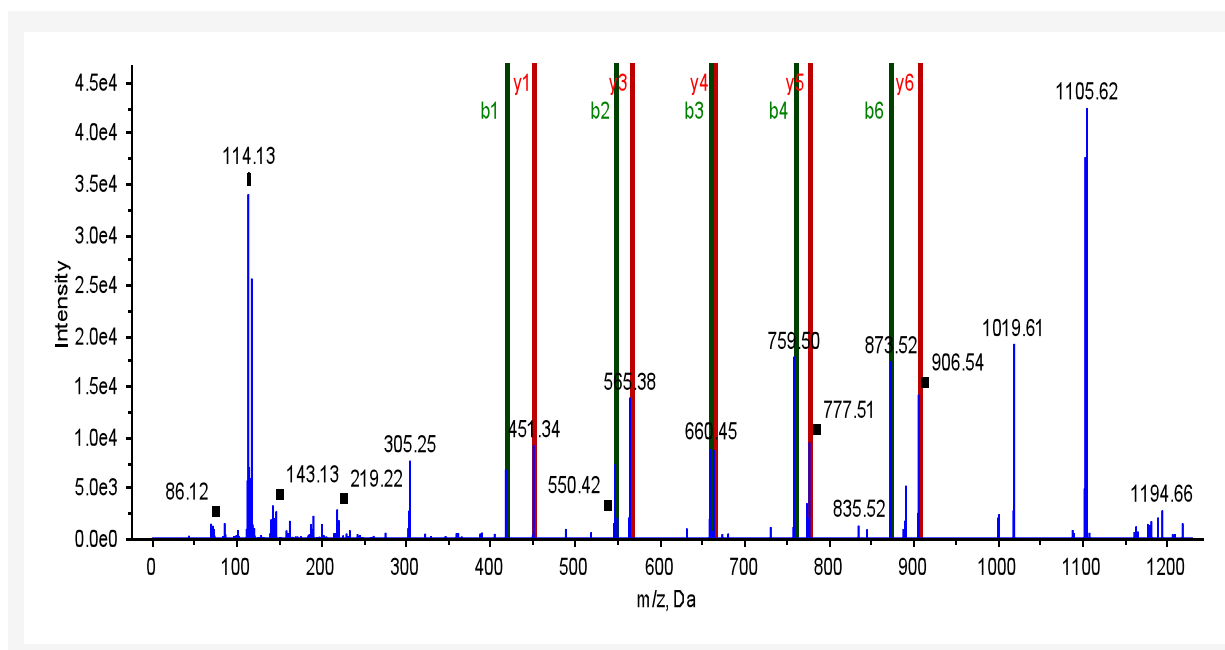

| Residue | b       | y       |
|---------|---------|---------|
| L       | 418.30  | 1323.85 |
| E       | 547.34  | 906.56  |
| L       | 660.42  | 777.51  |
| V       | 759.49  | 664.43  |
| G       | 816.51  | 565.36  |
| G       | 873.53  | 508.34  |
| K[IT8]  | 1305.84 | 451.32  |

**Multiple IDs for V[L/I]A[L/I][L/I]R:**  
 m/z 988.6803 iTRAQ8plex@0; semitryptic confidence 0.99  
**DVUA0013, DVU2885, DVU3167**  
 S5\_442-444\_092110\_(2\_3\_10)\_(2\_3\_2)\_(2\_3\_7).group

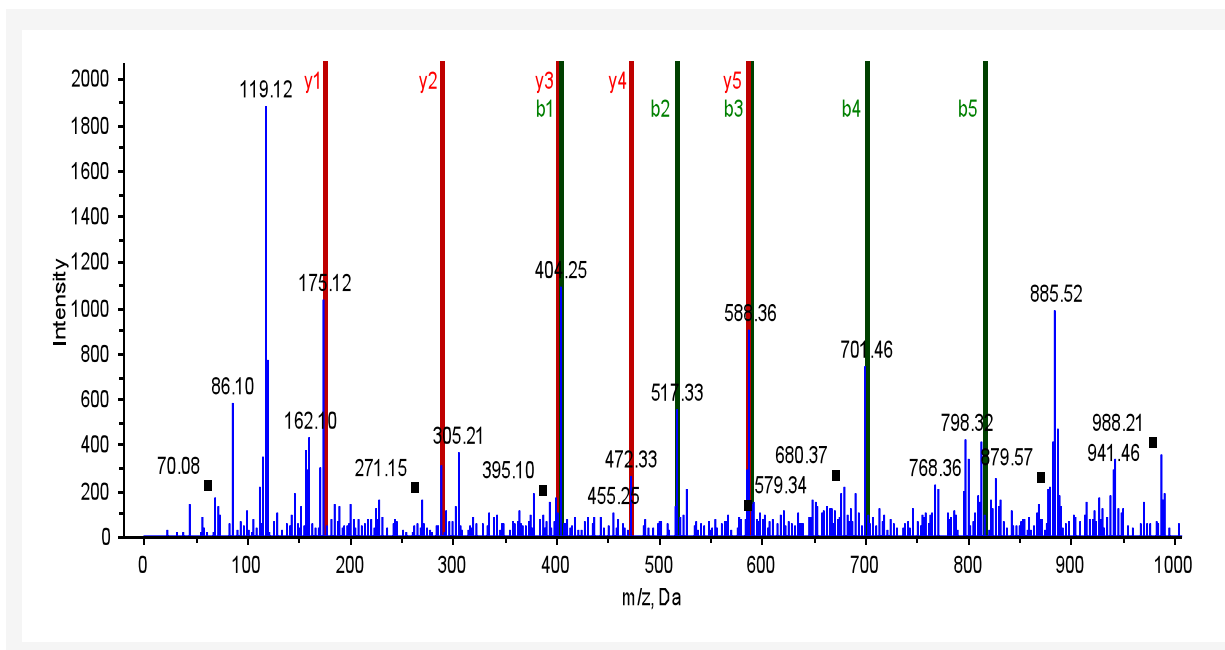

| Residue | b      | y      |
|---------|--------|--------|
| V       | 404.28 | 988.68 |
| L/I     | 517.37 | 585.41 |
| A       | 588.40 | 472.32 |
| L/I     | 701.49 | 401.29 |
| L/I     | 814.57 | 288.20 |
| R       | 970.67 | 175.12 |

### Competitor Protein: DVUA0039\_LFYIR

m/z 1015.632 iTRAQ8plex@0; cleaved G-L@N-term;

confidence 0.99

Primary ID: DVU3207\_LFYIR

AS1\_2C4\_2D\_SEC\_B6-B12\_(2\_3\_4).group

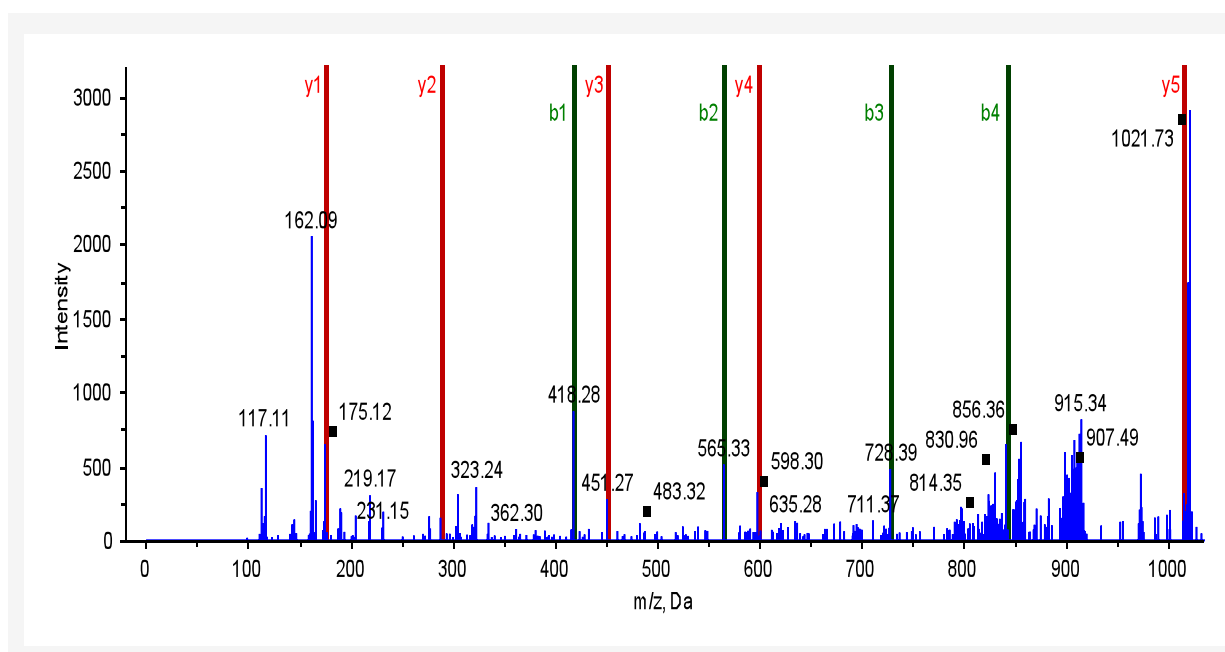

| Residue | b        | y        |
|---------|----------|----------|
| L       | 418.2967 | 1015.624 |
| F       | 565.3651 | 598.3348 |
| Y       | 728.4284 | 451.2663 |
| I       | 841.5125 | 288.203  |
| R       | 997.6136 | 175.119  |

**Competitor Protein: DVUA0046\_QEARGGK**

m/z 1353.767

iTRAQ8plex@7;iTRAQ8plex@0; missed R-G@4

confidence 0.99

Primary ID: DVU1833\_EQHFGK

S5\_376-378\_8plex\_1-3\_correct\_02-11-10\_(2\_3\_9).group

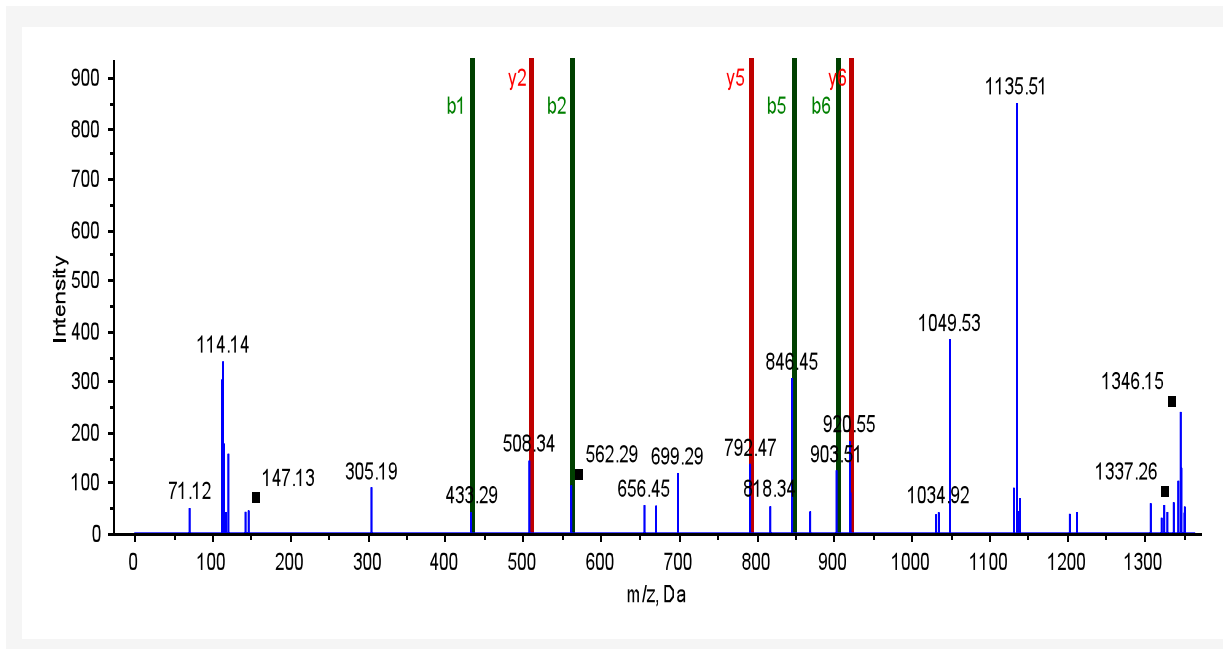

| Residue | b       | y       |
|---------|---------|---------|
| Q       | 433.27  | 1353.81 |
| E       | 562.31  | 921.54  |
| A       | 633.35  | 792.50  |
| R       | 789.45  | 721.46  |
| G       | 846.47  | 565.36  |
| G       | 903.50  | 508.34  |
| K[IT8]  | 1335.80 | 451.32  |

### Competitor Protein: DVUA0086\_VFERAR

m/z 1081.63 iTRAQ8plex@0; missed R-A@4 confidence 0.99

Primary ID: DVU2376A\_VFEINR

2C2\_C10\_C12\_S5\_333\_331\_082509\_(3\_4\_4).group

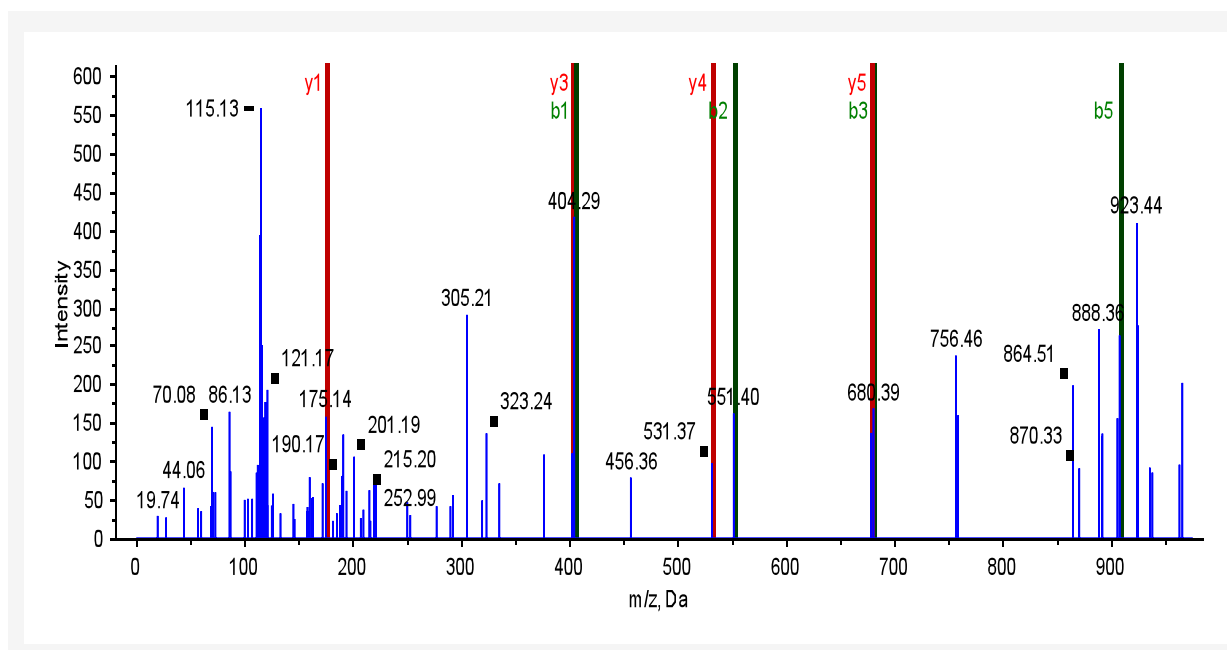

| Residue | b       | y       |
|---------|---------|---------|
| V       | 404.28  | 1081.64 |
| F       | 551.35  | 678.37  |
| E       | 680.39  | 531.30  |
| R       | 836.49  | 402.26  |
| A       | 907.53  | 246.16  |
| R       | 1063.63 | 175.12  |
